# Supplementary material for: Evolution and divergence of the mammalian SAMD9/SAMD9L gene family
Source: PubMed Central journal article supplement (PMC3685527; doi:10.1186/1471-2148-13-121), 2013-06-12
Supplement: 1471-2148-13-121-S1.pdf [file 1471-2148-13-121-S1.pdf]

|             | 10                      | 20                       | 30                       | 40                    | 50       | 60 | 70 | 80    | 90     | 100  |
|-------------|-------------------------|--------------------------|--------------------------|-----------------------|----------|----|----|-------|--------|------|
| SAMD9_Hosa  | MAKQLNLPENTDDWTKEDVNQWL | -ESHKIDQKHREILTEQDVNGAVL | KWLKKEHLVDMGITHGPAIQIEEL | FKELRKTAIEDSIQTSKMGKP | --SKNAPK |    |    |       |        |      |
| SAMD9_Patr  |                         |                          |                          |                       |          |    |    |       |        |      |
| SAMD9_Gogo  |                         |                          |                          | G                     |          |    |    | Q     | T      |      |
| SAMD9_Poab  |                         |                          |                          | G                     |          |    |    |       | M      |      |
| SAMD9_Nole  |                         | E                        |                          | G                     |          |    |    |       |        | V    |
| SAMD9_Mamu  | Q                       | R                        |                          | G                     |          |    |    | Q     | R      |      |
| SAMD9_Bota  | A                       |                          | E                        | A                     | S        | I  | Y  | T     | D      | A    |
| SAMD9_Susc  | A                       | K                        | R                        |                       | D        | A  | N  | Y     | T      | I    |
| SAMD9_Eqca  | A                       |                          | R                        |                       | I        | A  | S  | I     | T      | NN   |
| SAMD9_Mylu  | A                       |                          | D                        | R                     |          | D  | K  |       | F      | T    |
| SAMD9_Orcu  | E                       | PE                       | R                        |                       | H        | D  | VA | S     | F      | SD   |
| SAMD9_Rano  | ET                      | K                        | L                        |                       | R        |    | MA | S     | V      | N    |
| SAMD9_Crgr  | EK                      |                          | N                        |                       | L        |    | G  |       | T      | ML   |
| SAMD9_Capo  | E                       | PH                       | I                        |                       | R        |    | I  | A     | S      | T    |
| SAMD9_Soar  | A                       | P                        | SK                       | P                     |          | I  |    | E     | N      | K    |
| SAMD9L_Hosa | S                       | VS                       | MIK                      |                       | H        | KK | VN | DL    | NEQYGQ | LSEE |
| SAMD9L_Patr | S                       | VS                       | MIK                      |                       | H        | KK | VT | DL    | NEQYGQ | LSGE |
| SAMD9L_Gogo | S                       | VS                       | MIK                      |                       | H        | KK | VN | DL    | SEQYGQ | FSEE |
| SAMD9L_Poab | S                       | VS                       | MIE                      |                       | H        | KK | VT | DL    | NEQYGQ | LSEE |
| SAMD9L_Nole | S                       | VS                       | MIK                      |                       | H        | KK | VT | DL    | NEQYGQ | LSEE |
| SAMD9L_Caja | S                       | VT                       | MIK                      |                       | H        | KK | VT | DL    | E      | YGQ  |
| SAMD9L_Mamu | S                       | VS                       | IIK                      |                       | H        | KK | VT | DL    | NEQYGQ | LSEE |
| SAMD9L_Leaf | SE                      | VT                       | M                        | Q                     |          | H  | KK | VT    | DL     | E    |
| SAMD9L_Eqca | NE                      | A                        | M                        | K                     |          | H  | K  | VT    | KDL    | GE   |
| SAMD9L_Calu | NEEV                    |                          | VV                       |                       | H        | K  | VT | KHLNV | E      | YGQ  |
| SAMD9L_Aime | SE                      | V                        | II                       | N                     |          | H  | K  | VT    | KDL    | E    |
| SAMD9L_Ereu | DE                      | V                        | M                        | Q                     |          | H  | K  | VT    | N      | DL   |
| SAMD9L_Mumu | SG                      | VT                       | Q                        | KL                    | IK       |    | H  | RK    | VT     | DL   |
| SAMD9L_Crgr | NE                      | V                        | T                        | A                     | KL       | VK |    | Q     | KK     | IT   |
| SAMD9L_Rano | DR                      | H                        | V                        | T                     | Q        | KL | IK |       | H      | RK   |
| SAMD9L_Capo | NE                      | GT                       |                          | MIK                   |          | DH | KK | IT    | EL     | E    |
| SAMD9L_Soar | SE                      | HT                       |                          | M                     | KA       |    | K  | VT    | VL     | Q    |
| SAMD9L_Modo | E                       | T                        |                          | P                     |          | V  |    | C     | IT     | KL   |

|             | 110                              | 120                             | 130                                   | 140                     | 150                                             | 160                                           | 170                   | 180         | 190       | 200    |
|-------------|----------------------------------|---------------------------------|---------------------------------------|-------------------------|-------------------------------------------------|-----------------------------------------------|-----------------------|-------------|-----------|--------|
| SAMD9_Hosa  | DQTVS                            | QKERRETSKQKQK                   | GKENPDMANPSAMS                        | -----                   | TTAKGSKSLKVELI                                  | --                                            | EDKIDYTKERQPSIDLTCVSY | PFDEFSN     | PNPYRYKLD | DFSL   |
| SAMD9_Patr  | .....                            | R.....                          | .....                                 | -----                   | .....                                           | -----                                         | .....                 | L.....      | .....     | .....  |
| SAMD9_Gogo  | .....                            | .....                           | .....                                 | -----                   | .....                                           | -----                                         | .....                 | .....       | .....     | .....  |
| SAMD9_Poab  | .....                            | H.....                          | D.....                                | TI.....                 | -----                                           | I.S.....                                      | M--                   | Q.....      | N.....    | I..... |
| SAMD9_Nole  | .....                            | A.....                          | .....                                 | T.....                  | -----                                           | I.....                                        | -----                 | E.....      | .....     | H..... |
| SAMD9_Mamu  | .....                            | S.....                          | D.....                                | T.....                  | -----                                           | I.V.E.....                                    | .....                 | .....       | .....     | I..... |
| SAMD9_Bota  | T.---                            | QKGG...                         | ..N.KKS.KV.D.TV.                      | -----                   | VT.....                                         | ..N.FM--                                      | E.D.KK.               | TEP.MA..... | D.....    | N.K.   |
| SAMD9_Susc  | K.---                            | EKN.....                        | D..TS.RVTD.TI.                        | -----                   | VTE..M..NN.FM--                                 | E.ND.QKK.S                                    | VE.M.P.....           | D.....      | N...      | .....  |
| SAMD9_Eqca  | T..M.E.NG.....                   | N..KS....                       | APT.....                              | -----                   | VT.D.....                                       | N.FK--VNE..D..K..VE.                          | .....                 | D.....      | N...      | .....  |
| SAMD9_Mylu  | T..LM.E.NE.....                  | H...KS...                       | A.T.....                              | -----                   | V--.....                                        | S.F.--G.E..D..K.....                          | .....                 | D.....      | C.....    | .....  |
| SAMD9_Orcu  | K.PLV..K.D.....                  | N..S.P.DG..A.                   | -----                                 | PGE.EP..P.T.TDN.        | ERGD..KL.AKEPS.R.H..NK.DEQW..                   | H.I.                                          | .....                 | .....       | .....     | .....  |
| SAMD9_Rano  | T.---                            | T.S....                         | N.N.RAE..SCK.DT.V.P                   | ---                     | EGNSQRTAASEP.....                               | E.ND.V--..AVQ-QDK.A                           | PGP..IA..N.....       | H.I.        | .....     | .....  |
| SAMD9_Crgr  | T.---                            | T.I...P..N.R.E..T.K.DA.         | LR-----                               | PE..AE.A.N..M--..       | TEL-QGK.SPPGP..IA..N.....                       | H.I.                                          | .....                 | .....       | .....     | .....  |
| SAMD9_Capo  | K.HLM..G.....                    | R.SD..ISHK.                     | -----                                 | E...PDS..M--.NQP.D----- | VKQP..LP..NT.....                               | H.I.                                          | .....                 | .....       | .....     | .....  |
| SAMD9_Soar  | V..L..S.NG.K..K...D..KS.TVDT.TTH | -----                           | V..S...VEN.F--.D.--Q.K.L.TEQ..IP..... | D.....                  | EN.V.                                           | .....                                         | .....                 | .....       | .....     | .....  |
| SAMD9L_Hosa | KT-----                          | HQKNP.HTK.EE..SMSS.I-DYDP       | ---                                   | REIRDIKQESIL---         | MKENV.DEVANAKHK.KGLKPEQ..MP...Q.HDSH..IEHYT.    | .....                                         | .....                 | .....       | .....     | .....  |
| SAMD9L_Patr | KT-----                          | HQKNP.HTK.EE..SMSS.I-DYDP       | ---                                   | REIRDIKQESIL---         | MKENV.DEVANAK.KK.KGLKPEQ..MP...Q.HDSH..IEHYT.   | .....                                         | .....                 | .....       | .....     | .....  |
| SAMD9L_Gogo | KT-----                          | HQKNP.HTK.EE..STSS.I-DYDP       | ---                                   | REIRDIKQESIL---         | MKENV.DEVANAK.KK.KGLKPEQ..MP...Q.HDSH..IEHYT.   | .....                                         | .....                 | .....       | .....     | .....  |
| SAMD9L_Poab | KT-----                          | HQKNP..TK.EE..SMSS.I-DYDP       | ---                                   | REIRDIKQESIL---         | MKENV.DEVANAK.KK.KGLKPEQ..MP...Q.HDSH..IEHYT.   | .....                                         | .....                 | .....       | .....     | .....  |
| SAMD9L_Nole | KT-----                          | HQKNP..TK.EE..SKSS.I-DYDP       | ---                                   | REIRDVKQESIL---         | MKENV.DEVANAK.KK.KGLKPEQ..MP...Q.HDSH..IEHYT.   | .....                                         | .....                 | .....       | .....     | .....  |
| SAMD9L_Caja | KT-----                          | HHKKP..TK.KEK.SMSS.I-DYDP       | ---                                   | REVRDIKQESIL---         | MKENV.DEA.NAK.KK.DKLKPER..MP...Q.HDGQ..IEHYT.   | .....                                         | .....                 | .....       | .....     | .....  |
| SAMD9L_Mamu | KR-----                          | HQKDP..TK.EE..STSS.I-DYDP       | ---                                   | REVRDIKERESIL---        | MKENV.EEVANAK.KK.GELKPEQ..MP...Q.HDSH..IEHYT.   | .....                                         | .....                 | .....       | .....     | .....  |
| SAMD9L_Leaf | KK-----                          | Q-KKA.-----                     | KSISSSI-DHDL                          | ---                     | TEIGDIKERESIL---                                | MKENATNEVAATK.KK.NKVKTEQ..MP...Q.HDSQ..TEHYI. | .....                 | .....       | .....     | .....  |
| SAMD9L_Eqca | KE-----                          | HK.KPQ.TK.E..KSTSS.I-DHNL       | ---                                   | RETRDTKQESIL---         | MKENA.NEVV-TK.KQ.NKLQAEQ..MP...Q.HDSQ..IEHYI.   | .....                                         | .....                 | .....       | .....     | .....  |
| SAMD9L_Calu | KK-----                          | HPKKPQ.MK.EE.KSVLS.I-DHDL       | ---                                   | REARDTKQESIL---         | MKEDA.NEGATAE.QNEDKLGIKQ..MP...Q.H.SHC.IENSV.   | .....                                         | .....                 | .....       | .....     | .....  |
| SAMD9L_Aime | KK-----                          | HPKKPQRMK.EE.KSVLS.N-DHDL       | ---                                   | REMRDTKQESIL---         | VKEDA.NEEVTTE.QNED.TETEQ..MP...Q.H.SQ..IEHSI.   | .....                                         | .....                 | .....       | .....     | .....  |
| SAMD9L_Ereu | KK-----                          | HQRK--H--KT..T-LS.N-DHDV        | ---                                   | REIQNAKAQELA.---        | TG.NAQDEVGITEEK-.KKRKIVQS..MP...Q.HASHH.TEHYI.  | .....                                         | .....                 | .....       | .....     | .....  |
| SAMD9L_Orcu | KK-----                          | KQQKKP...S.EEGTMSL.I-DHDL       | ---                                   | RETTEIEVQESIP---        | LKEKA.DETVNA.K-ENAIQTER..MP...Q.HDSQ..IEHYI.    | .....                                         | .....                 | .....       | .....     | .....  |
| SAMD9L_Mumu | TK-----                          | QQTK---TKNEE..SVSS.S-DHGL       | ---                                   | RETGQNEEQEPSL---        | TKENM.GDVV-TK.MEDNKPPEQMS.TP...S.CDVQK.IEHSI.   | .....                                         | .....                 | .....       | .....     | .....  |
| SAMD9L_Crgr | IK-----                          | HPKK---TNNEE.KLISS.S-GHDL       | ---                                   | REMGLNTEQEPSL---        | LKEKA.SDVL-TK.MEGNTAKPEQMS.MP...S.HDDR..IERYI.  | .....                                         | .....                 | .....       | .....     | .....  |
| SAMD9L_Rano | IN-----                          | QPKK---SNSEE..SISS.S-DFGL       | ---                                   | RETGQNEEQEPSI---        | MKVNT.GDV.-TK.MKDNMPK.EQMS.MPH..NFAHDAK..IEHSI. | .....                                         | .....                 | .....       | .....     | .....  |
| SAMD9L_Capo | KK-----                          | HQKKP---NLEKELMPSSI-DQDL        | ---                                   | SESARNIKDQDSIP---       | MEENAANEVSNNT..KK.NKLTEN..PP...N.HDGQ..IEHYI.   | .....                                         | .....                 | .....       | .....     | .....  |
| SAMD9L_Soar | KK-----                          | KSKKN.Q--NTKE.KLVSS.S-DHDL      | ---                                   | KESVNTKEQESVP---        | IE.DS.DYQGIPE.Q-.GKLKKEQS...P...Q.HDSR..VEHQI.  | .....                                         | .....                 | .....       | .....     | .....  |
| SAMD9L_Modo | --W.T.EKN.KR-----                | RR---HHTD.-KNDTTTQDEEVYESPKTNPS | ---                                   | KGTESNAEET-----         | DNL.FRGQ..QT...K.HKSF..REQTII                   | .....                                         | .....                 | .....       | .....     | .....  |

|             | 210                  | 220                 | 230                 | 240                | 250                | 260  | 270 | 280 | 290 | 300    |
|-------------|----------------------|---------------------|---------------------|--------------------|--------------------|------|-----|-----|-----|--------|
| SAMD9_Hosa  | Q-PETGPGNLIDPIHEFKAF | TNTATATEEDVKMKFSNEV | FRFASACMNSRTNGTIHFG | VKDKPHGKIVGIKVTNDT | KEALINHFNLINKYFEDH | QVQA |     |     |     |        |
| SAMD9_Patr  |                      |                     |                     |                    |                    |      |     |     |     |        |
| SAMD9_Gogo  |                      |                     |                     |                    |                    |      | S   |     |     |        |
| SAMD9_Poab  |                      |                     |                     |                    |                    | I    | S   |     |     |        |
| SAMD9_Nole  |                      |                     |                     |                    |                    |      | S   |     |     |        |
| SAMD9_Mamu  |                      |                     | E                   |                    |                    |      | V   | S   |     |        |
| SAMD9_Bota  | L                    | E                   | G                   | A                  |                    | T    | VEF | TI  | D   | HQ     |
| SAMD9_Susc  | L                    | E                   | K                   |                    |                    |      | VE  | TV  | F   | M      |
| SAMD9_Eqca  | L                    | ER                  | R                   | I                  |                    |      | V   | STV | T   | D      |
| SAMD9_Mylu  | L                    | E                   | KN                  |                    |                    |      | VN  | SV  | D   | HQ     |
| SAMD9_Orcu  |                      |                     |                     |                    | ?                  | L    | -   | Q   | V   | LASI   |
| SAMD9_Rano  | L                    | V                   | L                   | E                  | I                  |      | Q   | Q   | R   | MEL    |
| SAMD9_Crgr  | L                    | V                   | E                   | K                  | S                  | I    | I   | Q   | R   | VDLSTV |
| SAMD9_Capo  | Q                    | L                   | D                   | K                  | I                  | T    |     | M   | SV  | E      |
| SAMD9_Soar  | L                    | K                   | IEKG                | K                  | I                  | I    | K   | E   | I   | VRFIAI |
| SAMD9L_Hosa | AL                   | L                   | E                   | V                  | I                  |      |     | E   | V   | I      |
| SAMD9L_Patr | AL                   | L                   | E                   | V                  | I                  |      |     | E   | V   | I      |
| SAMD9L_Gogo | AL                   | L                   | E                   | V                  | I                  |      |     | E   | V   | I      |
| SAMD9L_Poab | AL                   | L                   | E                   | A                  | IN                 |      |     | E   | V   | I      |
| SAMD9L_Nole | AL                   | L                   | E                   | A                  | I                  |      | N   | E   | V   | I      |
| SAMD9L_Caja | SL                   | L                   | ER                  | I                  | L                  |      |     | E   | VNI | SKD    |
| SAMD9L_Mamu | AL                   | L                   | E                   | A                  | I                  |      |     | E   | V   | I      |
| SAMD9L_Loaf | L                    | L                   | D                   | K                  | I                  | H    |     | E   | V   | ASKD   |
| SAMD9L_Eqca | L                    | L                   | E                   | K                  | I                  | A    |     | N   | E   | V      |
| SAMD9L_Calu | L                    | L                   | EA                  | K                  | I                  |      | NR  | Q   | V   | A      |
| SAMD9L_Aime | L                    | L                   | EA                  | K                  | I                  |      | N   | Q   | V   | SKD    |
| SAMD9L_Ereu | L                    | L                   | E                   | K                  | I                  |      | L   | E   | V   | RSKD   |
| SAMD9L_Orcu | L                    | L                   | A                   | I                  |                    |      |     | E   | V   | ISSKD  |
| SAMD9L_Mumu | RVA                  | L                   | KK                  | I                  | T                  | A    |     | E   | VQ  | SKD    |
| SAMD9L_Crgr | VA                   | L                   | V                   | L                  | E                  | I    | I   | H   | E   | V      |
| SAMD9L_Rano | RVA                  | L                   | V                   | E                  | Q                  | QM   | T   | A   | T   | E      |
| SAMD9L_Capo | L                    | L                   | EN                  | L                  | T                  |      |     |     | E   | V      |
| SAMD9L_Soar | R                    | L                   | ESVE                | K                  | I                  |      |     | L   | Q   | E      |
| SAMD9L_Modo | SF                   | L                   | ER                  | IL                 |                    | C    |     | S   | E   | L      |



|             | 410                                                                                                    | 420 | 430            | 440                            | 450 | 460                         | 470                          | 480 | 490 | 500 |
|-------------|--------------------------------------------------------------------------------------------------------|-----|----------------|--------------------------------|-----|-----------------------------|------------------------------|-----|-----|-----|
| SAMD9_Hosa  | AAEEKFRAKTNKKEREGPKLVKLLTGNQDLLDNSYYEQYILVTNKCHPDQTKHLDFLKEIKWFAVLEFDPE\$SNINGVVKAYKESRVANLHFPSVYVEQKT |     |                |                                |     |                             |                              |     |     |     |
| SAMD9_Patr  | .....                                                                                                  |     |                |                                |     |                             |                              |     |     |     |
| SAMD9_Gogo  | .....                                                                                                  |     |                |                                |     |                             |                              |     |     |     |
| SAMD9_Poab  | .....E..                                                                                               |     |                |                                |     |                             |                              |     |     |     |
| SAMD9_Nole  | .....K.....E..                                                                                         |     |                |                                |     |                             |                              |     |     |     |
| SAMD9_Mamu  | .....QD.A.....I...G..                                                                                  |     |                |                                |     |                             |                              |     |     |     |
| SAMD9_Bota  | E...C.V.....S.....                                                                                     |     |                | DW...I...T.I.....              |     |                             | VSK.....T.V.....L...G..      |     |     |     |
| SAMD9_Susc  | E...C.L.....S.....                                                                                     |     | K.....         | DW...I...T.I.....              |     |                             | VSE.....V.....L...G..        |     |     |     |
| SAMD9_Eqca  | E...Y.L.S...N.....                                                                                     |     |                | DW.....N.I.....                |     |                             | VS.....IT.....L.M.G..        |     |     |     |
| SAMD9_Mylu  | E...C.I...N.NS.....                                                                                    |     | IE...K.....    | W.....N.I.....                 |     | D...                        | VSK...N.....IV...L...L...G.. |     |     |     |
| SAMD9_Orcu  | E..DNCT...NRH-.FR.E.....                                                                               |     |                | DW.....N.IQY.....              |     |                             | ES...RSF...L.....Q.S.G..     |     |     |     |
| SAMD9_Rano  | E..K.SKV.SDGSNSQ.Q.ID.....                                                                             |     | K.....H.W..... |                                |     |                             | ES.....F.G.....LFI.E.P       |     |     |     |
| SAMD9_Crgr  | E..T..KE.PEGNKS.Q.ID.....                                                                              |     |                | W...I.....N.NS.E.....          |     |                             | ES.....F.Q.....QF.E..        |     |     |     |
| SAMD9_Capo  | E...CKL...NNS.S...T.....                                                                               |     |                | DW.....II.....I.....           |     |                             | KTK.L.F...A...S.QF.E..       |     |     |     |
| SAMD9_Soar  | E..N.L.S...S...RM.....                                                                                 |     |                | SL.....QN.VN.....L.....        |     |                             | ASK.....Q...E..              |     |     |     |
| SAMD9L_Hosa | E...EYGM.AM...S.L.....                                                                                 |     | I.R.S.....     | DW.....N.I.....                |     |                             | M.....NQ.EDKT.               |     |     |     |
| SAMD9L_Patr | E...EYGM.AM...S.L.....                                                                                 |     | I.R.S.....     | DW.....N.I.....                |     | M.....                      | M.....NQ.EDKT.               |     |     |     |
| SAMD9L_Gogo | E...EYGM.AM...S.L.....                                                                                 |     | I.R.S.....     | DW.....N.I.....                |     |                             | M.....NQ.EDKT.               |     |     |     |
| SAMD9L_Poab | E...EYGM.AI...S.L.....                                                                                 |     | I.R.S.....     | DW.....N.I.....                |     |                             | M.....NQ.EDKT.               |     |     |     |
| SAMD9L_Nole | E...EYGM.AM...S.L.....                                                                                 |     | I.R.S.....     | DW.V.....N.I.....              |     |                             | M.....Q.....NQ.EDKT.         |     |     |     |
| SAMD9L_Caja | E...EY.M.AK...S.L.....                                                                                 |     | R.S.....       | DW...I...N.I.....              |     |                             | QS.....R.....NQ.EDKTM        |     |     |     |
| SAMD9L_Mamu | E...EYGM..M...S.L.....                                                                                 |     | I.R.S.....     | DW.....N.I.....                |     |                             | V.....NQ.EDKT.               |     |     |     |
| SAMD9L_Loaf | E...EYGV.A...S.L.A...I.SR.S.D...                                                                       |     |                | DW.....S.N.....                |     |                             | VSK.....DQ.EKKA              |     |     |     |
| SAMD9L_Eqca | E...EYEV.A...S.Q.....                                                                                  |     | I.R.S.....     | NW...I...N.N.....              |     |                             | QSK.A.F.K.....Q.E.KS.        |     |     |     |
| SAMD9L_Calu | E...EYEM.ADR.S.Q.....                                                                                  |     | I.R.S.....     | NW.....N.N...M.L.....          |     |                             | VSK.....K.I...NQFE.KTN       |     |     |     |
| SAMD9L_Aime | V...EYEV.A...S.Q.....                                                                                  |     | I.R.S.....     | SW.....N.N...M.....            |     |                             | VSK.....K.....NQFE.KSN       |     |     |     |
| SAMD9L_Ereu | D..KEHEM.A...C.Q.I...I...S.....                                                                        |     |                | NW.....N.S.R--.....            |     |                             | ESK.A.T.R.....-NQ.A.KT.      |     |     |     |
| SAMD9L_Mamu | E...EYGR.AT...S.L.....                                                                                 |     | I.R.S.....     | SW.....N.....                  |     |                             | G.....Q.EDKTS                |     |     |     |
| SAMD9L_Mumu | ...EL.M-VT...S.L.S...RH.GS.E...                                                                        |     |                | DW.....T.A.T.LE.E.I.M.L...D... |     | Y.H.K.....R...I...L.H.E.K-  |                              |     |     |     |
| SAMD9L_Crgr | E...QQ.M-VT...S.L.A...RH.GS.....                                                                       |     |                | DW...N.A.N.IE.....L...D...     |     | Y.Q.K.....R...I...L.Q.E.K-S |                              |     |     |     |
| SAMD9L_Rano | ..-ECMV-VS.DS.L.S...RH.GS.K...                                                                         |     |                | DW...S.V.T.ME...I...L...D...   |     | Y.H.K.....R.....L.H.E.K-    |                              |     |     |     |
| SAMD9L_Capo | D...EHQM.T.R.S.L.....                                                                                  |     | I.R.S.....     | NS.....N.MQ.....               |     |                             | R...A...QK...M...NQ.E.K..    |     |     |     |
| SAMD9L_Soar | E...DEV.V.Q.S.Q.I...I.R.S.S...                                                                         |     |                | NW.....N...Y...S...D...        |     |                             | VSK...VFQ.....Q...G.S        |     |     |     |
| SAMD9L_Modo | E.-DHQP.EI.T.N.T.H.....                                                                                |     |                | D...V.S.S.IE.....E.....        |     |                             | LNT.A.R.T.A.....NQ.QDN..     |     |     |     |

|             | 510                              | 520                       | 530                                  | 540                             | 550                       | 560                   | 570             | 580                      | 590                   | 600                     |
|-------------|----------------------------------|---------------------------|--------------------------------------|---------------------------------|---------------------------|-----------------------|-----------------|--------------------------|-----------------------|-------------------------|
| SAMD9_Hosa  | TPNETISTLNLYHQPSWIFCNGRLDL       | DSEKYKFPDPSSWQRERASDVRKLI | SFLTHEDIMPRGKFLVVFLLLSSVDD           | PRDPLIETFCAFYQDLKGMENIL         |                           |                       |                 |                          |                       |                         |
| SAMD9_Patr  |                                  |                           |                                      |                                 |                           |                       |                 |                          |                       |                         |
| SAMD9_Gogo  |                                  |                           |                                      |                                 |                           |                       |                 |                          |                       |                         |
| SAMD9_Poab  | . . . . . M . . . . .            |                           | . . . . . N . . . . .                |                                 |                           | . . . . . R . . . . . |                 |                          |                       |                         |
| SAMD9_Nole  | . S . M . . . . .                |                           | . . . . . L . . . . .                |                                 |                           |                       |                 |                          |                       |                         |
| SAMD9_Mamu  | . . . . . K . . . . .            |                           | . . . . . S . . . . .                |                                 |                           |                       |                 |                          | . . . . . I . . . . . |                         |
| SAMD9_Bota  | . - T . K . TS . . .             | Q . L . . . . .           | . . . . . E . . . . .                | L . A . . . . .                 | K . E . . . . .           | Q . . . . .           |                 |                          |                       |                         |
| SAMD9_Susc  | . - . K . IS . . .               | Q . L . . . . .           | . . . . . L . . . . .                |                                 | K . E . . . . .           | I . . . . .           |                 |                          |                       | M . . . . .             |
| SAMD9_Eqca  | . S . K . TS . . .               | Q . . . . .               | . . . . . I . . . . .                | . . . . . L . . . . .           | . . . . . K . E . . . . . |                       |                 |                          |                       |                         |
| SAMD9_Mylu  | . . . . . K . S . . .            | Q . . . . .               | . . . . . L . . . . .                | . . . . . K . K . E . . . . .   |                           | V . . . . .           |                 |                          | . . . . . I . . . . . |                         |
| SAMD9_Orcu  | . T . M . N . . .                | Q . . . . .               | . . . . . S . GI . . .               | . . . . . L . I . . . . .       | . . . . . E . . . . .     | V . K . . . . .       | P . . . . .     |                          |                       |                         |
| SAMD9_Rano  | . VS . K . S . . .               | Q . . . . .               | . . . . . E . D . Q . L .            | . . . . . I . . . . .           | . . . . . E . R . . . . . | RD . . . . .          | E . . . . .     |                          |                       | N . . . . .             |
| SAMD9_Crgr  | . L . K . S . . .                | Q . . . . .               | . . . . . S . E . D .                | . . . . . L . I . . . . .       | . . . . . E . R . . . . . | F . RD . . . . .      | K . R . . . . . | P . . . . .              |                       | G . . . . .             |
| SAMD9_Capo  | . TE . K . S . . .               | QK . . . . .              | . . . . . S . . . . .                | E . V . V . . . . .             | K . E . . . . .           | R . . . . .           |                 |                          | K . . . . .           | T . . . . .             |
| SAMD9_Soar  | . TD . K . S . . .               | HQ . . . . .              | . . . . . - . . . . .                | D . . . . .                     | L . . . . .               | ????????????????????  |                 |                          | P . . . . .           | - . . . . .             |
| SAMD9L_Hosa | NMW . K . . . . .                | Q . . . . .               | . . . . . S . K . T .                | LE . HL . . . . .               | E . . . . .               | L . . . . .           | D . N . . . . . | T . . . . .              | ES . G . . . . .      | W . . . . .             |
| SAMD9L_Patr | NMR . K . . . . .                | Q . . . . .               | . . . . . S . K . T .                | LE . HL . . . . .               | E . . . . .               | L . . . . .           | D . N . . . . . | T . . . . .              | ES . G . . . . .      | W . . . . .             |
| SAMD9L_Gogo | NMR . K . . . . .                | Q . . . . .               | . . . . . S . K . T .                | LE . HL . H . . . . .           | E . . . . .               | L . . . . .           | D . N . . . . . | T . . . . .              | ES . G . . . . .      | W . . . . .             |
| SAMD9L_Poab | NMR . K . . . . .                | Q . . . . .               | . . . . . S . K . TH .               | LE . HL . . . . .               | E . . . . .               | L . . . . .           | D . N . . . . . | T . . . . .              | ES . G . . . . .      | W . . . . .             |
| SAMD9L_Nole | NMR . K . . . . .                | Q . . . . .               | . . . . . S . K . T .                | LE . YL . . . . .               | E . . . . .               | L . . . . .           | D . N . . . . . | T . . . . .              | ES . G . . . . .      | W . . . . .             |
| SAMD9L_Caja | NMR . K . . . . .                | A . . . . .               | Q . . . . .                          | S . K . T .                     | LEAHL . . . . .           | E . . . . .           | L . . . . .     | D . N . . . . .          | TR . . . . .          | FT . ES . V . . . . .   |
| SAMD9L_Mamu | NMR . K . . . . .                | A . . . . .               | Q . . . . .                          | S . K . T .                     | LE . HL . . . . .         | E . . . . .           | L . . . . .     | D . N . . . . .          | T . . . . .           | ES . G . . . . .        |
| SAMD9L_Load | . IR . M . F . . . . .           | E . . . . .               | . . . . . S . NN . T .               | L . HL . . . . .                | E . . . . .               | L . . . . .           | D . N . . . . . | TK . . . . .             | F . . . . .           | ES . G . . . . .        |
| SAMD9L_Eqca | PMR . K . S . . .                | Q . . . . .               | . . . . . T . KD . RH .              | LE . HL . . . . .               | EI . . . . .              | Q . . . . .           | D . NV . T .    | R . . . . .              | A . ES . G . . . . .  | S . . . . .             |
| SAMD9L_Calu | NIR . K . S . . .                | Q . T . . . . .           | . . . . . S . KN . S .               | LE . HL . H . . . . .           | E . . . . .               | L . . . . .           | D . N . . . . . | T . . . . .              | P . ES . G . . . . .  | A . . . . .             |
| SAMD9L_Aime | NIR . K . S . . .                | E . . . . .               | . . . . . S . KN . S .               | LE . HL . H . . . . .           | E . . . . .               | L . . . . .           | D . N . . . . . | T . . . . .              | ES . G . . . . .      | A . . . . .             |
| SAMD9L_Ereu | . MR . K . S ? S . W . . . . .   |                           |                                      |                                 |                           |                       |                 |                          |                       |                         |
| SAMD9L_Orcu | SLR . K . . . . .                | Q . . . . .               | . . . . . V . . . . .                | S . T . T .                     | E . HL . . . . .          | E . . . . .           | F . . . . .     | D . N . . . . .          | A . . . . .           | ES . G . . . . .        |
| SAMD9L_Mumu | . IA . K . . . . .               | K . E . . . . .           | . . . . . V . . . . .                | ---SCQ . LE . HL . . . . .      | D . . . . .               | G . . . . .           | R . . . . .     | D . N . . . . .          | IVK . V . . . . .     | PIENQK . . . . .        |
| SAMD9L_Crgr | . IE . K . . . . .               | K . FE . . . . .          | . . . . . KNDSCQ . LE . HL . . . . . | D . . . . .                     | G . . . . .               | R . . . . .           | D . N . . . . . | V . . . . .              | V . . . . .           | P . NNQK . . . . .      |
| SAMD9L_Rano | . IE . K . . . . .               | K . E . . . . .           | . . . . . V . . . . .                | ---SCQ . LE . HL . . . . .      | D . . . . .               | G . . . . .           |                 | DGN . IA . V . . . . .   |                       | P . ENQK . . . . .      |
| SAMD9L_Capo | . MRQK . S . . . . .             | E . T . . . . .           | . . . . . S . QN . T .               | LEAHL . . . . .                 | D . CE . . . . .          |                       |                 | D . NL . AK . . . . .    |                       | ESLG . FT . . . . .     |
| SAMD9L_Soar | . Q . . . . .                    | VCS . . . . .             | Q . T . . . . .                      | S . KGAV . . . . .              | LE . HL . NKN . . . . .   | E . T . . . . .       | L . . . . .     | D . S . A . . . . .      |                       | P . ES . G . . . . .    |
| SAMD9L_Modo | SIS . K . ESF . FK . T . . . . . |                           |                                      | A . FNT . E . Q . LEL . . . . . | IKK . TK . . . . .        |                       |                 | C . V . QP . R . . . . . |                       | P . E . K . F . . . . . |

|             | 610                                                                                                    | 620            | 630                   | 640      | 650      | 660                            | 670          | 680         | 690        | 700            |
|-------------|--------------------------------------------------------------------------------------------------------|----------------|-----------------------|----------|----------|--------------------------------|--------------|-------------|------------|----------------|
| SAMD9_Hosa  | CICVHPHIFQGWKDLLEARLIKHQDEISSQCISALSLEEINGTILKLSVTSQSSKRLLPISIGLSTVLL-KKEEDIMTALEIICENECEGTLLEKDRKNKFL |                |                       |          |          |                                |              |             |            |                |
| SAMD9_Patr  | .....                                                                                                  | .....          | .....                 | .....    | .....    | .....                          | .....        | .....       | .....      | .....          |
| SAMD9_Gogo  | .....                                                                                                  | .....          | .....                 | .....    | .....    | .....                          | .....        | .....       | .....      | .....          |
| SAMD9_Poab  | .....                                                                                                  | .....          | .....                 | .....    | .....    | .....                          | .....        | .....       | .....      | .....          |
| SAMD9_Nole  | ...Q.....                                                                                              | .....          | .....                 | .....    | .....    | .....                          | .....        | .....       | .....      | .....          |
| SAMD9_Mamu  | ...Q.....                                                                                              | .....          | .....                 | .....    | .....    | .....                          | .....        | .....S..... | .....      | .....          |
| SAMD9_Bota  | ...DSR.C.....                                                                                          | TTQ            | L.N.V.S.....          | .....    | .....    | F.S.....                       | .....        | .....       | L.D.I..... | K.L.           |
| SAMD9_Susc  | ...A.SR.C.....                                                                                         | A.QE           | L.....                | .....    | .....    | F.V.S.....                     | -R.....      | .....       | L.....     | EK...          |
| SAMD9_Eqca  | ...S.C.R.....                                                                                          | T.Q            | L.N.....              | .....    | .....    | L.F.S.....                     | .....        | .....       | S.L.....   | K...           |
| SAMD9_Mylu  | .V.S.C.R.....                                                                                          | T-             | L.S.....              | .....    | .....    | K.Q.F.S.....                   | -EM.....     | .....       | L.K.....   | N.....         |
| SAMD9_Orcu  | ...Q.C.....                                                                                            | T.E            | L.N.....              | N.Q..... | .....    | F.S.....                       | -Q.T.....    | .....       | L.D.....   | KD.K...        |
| SAMD9_Rano  | ...Y.V.....                                                                                            | V.SSQ          | L.S.FS.N.A.....       | .....    | .....    | L.F.V.S.....                   | -R.E.....    | .....       | L.....     | RE.LF          |
| SAMD9_Crgr  | ...S.FSS.Y.V.....                                                                                      | AGQ            | L.NRS.....            | N.A..... | .....    | L.F.....                       | ST.....      | -.....      | L.....     | N.K.LF         |
| SAMD9_Capo  | ...Q.N.C.....                                                                                          | TNE            | L.DK.....             | N.Q..... | N.I..... | E.....                         | CS.....      | -.....      | L.V.....   | H.T.LQ         |
| SAMD9_Soar  | V.-LNSQLC.I.....                                                                                       | KIQ            | LAN.....              | N.....   | .....    | V.K.....                       | S.....       | .....       | L.....     | D.D.....       |
| SAMD9L_Hosa | ...S.NS.Y.R.....                                                                                       | QT.MKM-E       | LTNHS.T.NI.LV.S.....  | .....    | .....    | R.R.F.AR.S.S.I.E.K.VL.....     | .....        | .....       | L.....     | TE.DI...S...   |
| SAMD9L_Patr | ...S.NS.Y.R.....                                                                                       | QT.MKM-E       | LTNHS.T.NI.LV.S.....  | .....    | .....    | R.R.F.AR.S.S.I.E.K.VL.....     | .....        | .....       | L.....     | TE.DI...S...   |
| SAMD9L_Gogo | ...S.NS.Y.R.....                                                                                       | QT.MKM-E       | LTNHS.T.NI.LV.S.....  | .....    | .....    | R.R.F.AR.S.S.I.E.K.VL.....     | .....        | .....       | L.....     | TE.DI...S...   |
| SAMD9L_Poab | ...S.NS.Y.R.....                                                                                       | QT.MKM-E       | LTNHS.T.NI.LV.S.....  | .....    | .....    | R.F.AH.S.S.I.E.K.VL.....       | .....        | .....       | L.....     | KD.DI...ES...  |
| SAMD9L_Nole | ...S.NS.Y.R.....                                                                                       | QT.MKM-E       | LTNHS.T.NI.LV.S.....  | .....    | .....    | PR.F.AH.S.S.I.E.K.VL.....      | .....        | .....       | L.....     | RD.DI...ES...  |
| SAMD9L_Caja | ...S.SS.Y.R.....                                                                                       | QT.MNI-E       | LTNHS.T.NI.LV.SS..... | .....    | .....    | R.F.AH.S.S.I.E.K.K.AL.....     | .....        | .....       | L.....     | RD.DI...ES...  |
| SAMD9L_Mamu | ...S.NS.Y.R.....                                                                                       | QT.MKM-E       | LTNHS.T.NI.LV.S.....  | .....    | .....    | R.F.AR.S.S.I.E.K.VL.....       | .....        | .....       | L.....     | RD.DI...ES...  |
| SAMD9L_Leaf | ...KSQ.Y.R.....                                                                                        | RT.TI-A        | LTNHS.T.N.Q.S.....    | .....    | .....    | I.R.F.R.S.S.I.E.LF.....        | .....        | .....       | L.....     | KD.DI...S...   |
| SAMD9L_Eqca | ...NSQ.Y.R.....                                                                                        | QT.TV-A        | LANHS.T.N.L.S.....    | .....    | .....    | P.E.R.F.S.S.I.E.....           | .....        | .....       | L.....     | RD.DI...EF.Q   |
| SAMD9L_Calu | ...NS.Y.R.....                                                                                         | QT.TI-A        | LTNHS.T.N.L.S.....    | .....    | .....    | P.LR.F.H.F.SII.E.....          | .....        | .....       | L.....     | KD.DI...S.Q    |
| SAMD9L_Aime | ...NSQ.Y.R.....                                                                                        | QT.TA-A        | LTNHS.T.N.L.S.....    | .....    | .....    | P.R.F.H.FAS.I.E.....           | TL.....      | .....       | L.....     | KD.DI...ES.Q   |
| SAMD9L_Ereu | ...T.Q.Y.R.....                                                                                        | QT.FVM-S       | LTNHS.T.N.LL.S.....   | .....    | .....    | F.R.S.S.I.E.....               | FL.....      | .....       | L.....     | GD.DI...EC.E   |
| SAMD9L_Orcu | ...NSQ.Y.R.....                                                                                        | KT.TV-AH.L.NHS | T.N.LV.S.....         | .....    | .....    | R.R.F.R.S.S.I.E.K.TL.....      | .....        | .....       | L.....     | RD.DI...ES...  |
| SAMD9L_Mumu | ...NSA.Y.Q.S.....                                                                                      | QV.EI-K.DLAKHS | T.NI.LV.N.....        | .....    | .....    | I.R.F.C.S.S.I.E.MD.....        | S.....       | .....       | L.....     | KD.DI...ESQ... |
| SAMD9L_Crgr | ...N.Y.R.S.....                                                                                        | QV.EI-KG.LAEHS | T.NIQLV.N.....        | .....    | .....    | I.R.F.C.S.S.I.E.I.TL.....      | .....        | .....       | L.....     | RD.DI...NESE.. |
| SAMD9L_Rano | ...N.S.Y.Q.S.....                                                                                      | QV.EI-K.DLAKHS | T.NI.LV.S.....        | .....    | .....    | I.R.F.C.S.S.I.E.MD.....        | S.....       | .....       | L.....     | RD.DI...ESQ... |
| SAMD9L_Capo | ...NSK.Y.R.....                                                                                        | QT.TI-G        | L.KHSV.T.NI.L.S.....  | .....    | .....    | L.RKF.Y.S.S.I.E.....           | LL.Q.LS..... | .....       | .....      | KE.DI...S...   |
| SAMD9L_Soar | ...NLD.YKQ.....                                                                                        | K.E-ES         | LEDHT.T.N.FL.S.....   | .....    | .....    | R.F.K.S.S.T.E.....             | TF.T.L.....  | .....       | .....      | KD.DI...NAS.Q  |
| SAMD9L_Modo | S.S.DQQ.GSQ.E.....                                                                                     | GKFSS-I        | -LCNR.TT.....         | QL.....  | .....    | PQ.E.PI.F.N.S.-II.Q.D.S.S..... | .....        | .....       | L.....     | KD.AI...E-T    |

|             | 710                                                                                                                                                                                                     | 720 | 730 | 740 | 750 | 760 | 770 | 780 | 790 | 800 |
|-------------|---------------------------------------------------------------------------------------------------------------------------------------------------------------------------------------------------------|-----|-----|-----|-----|-----|-----|-----|-----|-----|
| SAMD9_Hosa  | E F K A S K E E D F Y R G G K V S W W N F Y F S S E S Y S S P F V K R D K Y E R L E A M I Q N C A D S S K P T S T K I I H L Y H H P G C G G T T L A M H I L W E L R K K F R C A V L K N K T V D F S E I |     |     |     |     |     |     |     |     |     |
| SAMD9_Patr  | .....                                                                                                                                                                                                   |     |     |     |     |     |     |     |     |     |
| SAMD9_Gogo  | ..... A .....                                                                                                                                                                                           |     |     |     |     |     |     |     |     |     |
| SAMD9_Poab  | .....                                                                                                                                                                                                   |     |     |     |     |     |     |     |     |     |
| SAMD9_Nole  | ..... A .....                                                                                                                                                                                           |     |     |     |     |     |     |     |     |     |
| SAMD9_Mamu  | ..... C . D .....                                                                                                                                                                                       |     |     |     |     |     |     |     |     |     |
| SAMD9_Bota  | L                                                                                                                                                                                                       | T   | N   | K   | E   | R   | G   | S   | C   | V   |
| SAMD9_Susc  | L                                                                                                                                                                                                       | N   | E   | R   | K   | T   | E   | A   | C   | V   |
| SAMD9_Eqca  | D                                                                                                                                                                                                       | T   | K   | L   | I   | E   | W   | C   | V   | M   |
| SAMD9_Mylu  | L                                                                                                                                                                                                       | N   | K   | R   | H   | S   | C   | S   |     |     |
| SAMD9_Orcu  | K                                                                                                                                                                                                       | A   | N   | H   | A   | W   | I   | C   | A   |     |
| SAMD9_Rano  | T                                                                                                                                                                                                       | K   | N   | S   | V   | K   | K   | E   | W   | Q   |
| SAMD9_Crgr  | T                                                                                                                                                                                                       | A   | Q   | N   | S   | K   | K   | E   | W   | Q   |
| SAMD9_Capo  | T                                                                                                                                                                                                       | Y   | S   | K   | K   | E   | Y   | P   | L   | M   |
| SAMD9_Soar  | A                                                                                                                                                                                                       | T   | L   | K   | N   | A   | K   | D   | W   | S   |
| SAMD9L_Hosa | K                                                                                                                                                                                                       | H   | N   | D   | S   | K   | K   | D   | L   | H   |
| SAMD9L_Patr | K                                                                                                                                                                                                       | H   | N   | D   | S   | K   | K   | D   | L   | H   |
| SAMD9L_Gogo | K                                                                                                                                                                                                       | H   | N   | D   | S   | K   | K   | D   | L   | H   |
| SAMD9L_Poab | K                                                                                                                                                                                                       | H   | C   | N   | D   | S   | K   | K   | D   | L   |
| SAMD9L_Nole | K                                                                                                                                                                                                       | H   | N   | D   | S   | K   | K   | D   | L   | H   |
| SAMD9L_Caja | R                                                                                                                                                                                                       | K   | H   | N   | P   | D   | S   | K   | K   | D   |
| SAMD9L_Mamu | K                                                                                                                                                                                                       | H   | N   | D   | S   | K   | K   | D   | L   | H   |
| SAMD9L_Loaf | R                                                                                                                                                                                                       | K   | H   | R   | N   | A   | S   | H   | K   | D   |
| SAMD9L_Eqca | K                                                                                                                                                                                                       | K   | Y   | N   | A   | S   | K   | K   | D   | L   |
| SAMD9L_Calu | K                                                                                                                                                                                                       | L   | H   | N   | A   | S   | K   | K   | V   | L   |
| SAMD9L_Aime | T                                                                                                                                                                                                       | H   | N   | A   | S   | K   | K   | D   | L   | H   |
| SAMD9L_Erea | R                                                                                                                                                                                                       | K   | H   | N   | I   | R   | E   | R   | S   | L   |
| SAMD9L_Orcu | K                                                                                                                                                                                                       | H   | N   | A   | S   | K   | E   | K   | N   | L   |
| SAMD9L_Mumu | K                                                                                                                                                                                                       | R   | H   | R   | N   | A   | S   | F   | E   | T   |
| SAMD9L_Crgr | K                                                                                                                                                                                                       | K   | L   | R   | H   | R   | A   | N   | A   | G   |
| SAMD9L_Rano | K                                                                                                                                                                                                       | L   | R   | H   | R   | N   | A   | N   | F   | E   |
| SAMD9L_Capo | R                                                                                                                                                                                                       | K   | R   | H   | N   | A   | M   | K   | N   | K   |
| SAMD9L_Soar | I                                                                                                                                                                                                       | K   | N   | Q   | S   | N   | H   | T   | A   | R   |
| SAMD9L_Modo | Q                                                                                                                                                                                                       | M   | N   | K   | H   | L   | Y   | N   | H   | T   |



|             | 810      | 820    | 830       | 840    | 850    | 860     | 870    | 880    | 890    | 900    |         |          |         |        |        |        |         |
|-------------|----------|--------|-----------|--------|--------|---------|--------|--------|--------|--------|---------|----------|---------|--------|--------|--------|---------|
| SAMD9_Hosa  | GEQV     | TSLITY | GAMNRQ    | EYVPV  | LLLVDD | FEEQDN  | VYLLQ  | YSIQTA | IAKKYI | RYEKPL | VIIILNC | MRSQNP   | EPSAR-  | IPDSIA | VIQQLS | PKEQRA | FELKKEI |
| SAMD9_Patr  |          |        |           |        |        |         |        |        |        |        |         |          | K..K-   |        |        |        |         |
| SAMD9_Gogo  |          |        |           |        |        |         |        |        |        |        |         |          |         |        |        |        |         |
| SAMD9_Poab  |          |        |           |        |        |         |        |        |        |        |         |          |         |        |        |        |         |
| SAMD9_Nole  |          |        |           |        |        |         |        |        |        |        |         |          |         |        |        |        |         |
| SAMD9_Mamu  |          |        |           |        |        |         |        |        |        |        |         |          |         |        |        |        |         |
| SAMD9_Bota  |          |        |           |        |        |         |        |        |        |        |         |          |         |        |        |        |         |
| SAMD9_Susc  |          |        |           |        |        |         |        |        |        |        |         |          |         |        |        |        |         |
| SAMD9_Eqca  |          |        |           |        |        |         |        |        |        |        |         |          |         |        |        |        |         |
| SAMD9_Mylu  |          |        |           |        |        |         |        |        |        |        |         |          |         |        |        |        |         |
| SAMD9_Orcu  |          |        |           |        |        |         |        |        |        |        |         |          |         |        |        |        |         |
| SAMD9_Rano  |          |        |           |        |        |         |        |        |        |        |         |          |         |        |        |        |         |
| SAMD9_Crgr  |          |        |           |        |        |         |        |        |        |        |         |          |         |        |        |        |         |
| SAMD9_Capo  |          |        |           |        |        |         |        |        |        |        |         |          |         |        |        |        |         |
| SAMD9_Soar  |          |        |           |        |        |         |        |        |        |        |         |          |         |        |        |        |         |
| SAMD9L_Hosa | A..IN    | V..R   | KSH.D     | I..... | E..F   | NA.HSVL | E.DL.. | T..... | R..DE  | K-LA.. | LNY..   | S.....   | GA..... |        |        |        |         |
| SAMD9L_Patr | A..IN    | V..R   | KSH.D     | I..... | E..F   | NA.HSVL | E.DL.. | T..... | R..DE  | K-LA.. | LNY..   | S.....   | GA..... |        |        |        |         |
| SAMD9L_Gogo | A..IN    | V..R   | KSH.D     | I..... | E..F   | NA.HSVL | E.DL.. | T..... | R..DE  | K-LA.. | LNY..   | S.....   | GA..... |        |        |        |         |
| SAMD9L_Poab | A..IN    | V..R   | KSH.D     | I..... | E..F   | NA.HSVL | E.DL.. | T..... | R..DE  | K-LA.. | LNY..   | S.....   | GA..... |        |        |        |         |
| SAMD9L_Nole | A..IN    | V..K   | KSH.D     | I..... | E..F   | NA.HSVL | E.DL.. | T..... | R..DE  | K-LA.. | LNY..   | S.....   | GA..... |        |        |        |         |
| SAMD9L_Caja |          |        |           |        |        |         |        |        |        |        |         |          |         |        |        |        |         |
| SAMD9L_Mamu |          |        |           |        |        |         |        |        |        |        |         |          |         |        |        |        |         |
| SAMD9L_Loaf | D..N..   | K.TSH  | ..I.....  | LE     | ICI..  | DA.NSSL | ..GL.. | T..... | DR..   | K-SA.. | V.LKY   | .....    | A..E..  |        |        |        |         |
| SAMD9L_Eqca |          |        |           |        |        |         |        |        |        |        |         |          |         |        |        |        |         |
| SAMD9L_Calu | V...K... | K.TSH  | E.DI..... | PE     | CV..   | NA..IF  | E.DL.. | T..... | DE..   | K-SAY  | ..LMHR  | .....    | GD..... |        |        |        |         |
| SAMD9L_Aime | V...K... | K.TSP  | E.DI..... | DE     | ..V..  | NA.DSIL | E.GL.. | T..... | DET    | K-LA.. | V.LTY   | ..S..... | A..E..  |        |        |        |         |
| SAMD9L_Ereu |          |        |           |        |        |         |        |        |        |        |         |          |         |        |        |        |         |
| SAMD9L_Mumu |          |        |           |        |        |         |        |        |        |        |         |          |         |        |        |        |         |
| SAMD9L_Crgr |          |        |           |        |        |         |        |        |        |        |         |          |         |        |        |        |         |
| SAMD9L_Rano |          |        |           |        |        |         |        |        |        |        |         |          |         |        |        |        |         |
| SAMD9L_Capo |          |        |           |        |        |         |        |        |        |        |         |          |         |        |        |        |         |
| SAMD9L_Soar |          |        |           |        |        |         |        |        |        |        |         |          |         |        |        |        |         |
| SAMD9L_Modo | A..RT    | V...S  | EDQHS     | M..... | D      | EA.SD   | RNH.IS | LEEAA  | ..Q..  | T..... |         |          |         |        |        |        |         |

|             | 910         | 920        | 930        | 940    | 950       | 960      | 970       | 980       | 990   | 1000      |                |
|-------------|-------------|------------|------------|--------|-----------|----------|-----------|-----------|-------|-----------|----------------|
| SAMD9_Hosa  | KEQHKNFEDFY | SFMIMKTNFN | KEYIENVVRN | LKGQNI | FTKEAKLFS | FLALLNSY | VPDTTISLS | QCEKFLGIG | NKKA  | FWGTEKFED | KMGTYSTILIKTEV |
| SAMD9_Patr  | .....       | .....      | .....      | .....  | .....     | .....    | .....     | .....     | ..... | .....     | .....          |
| SAMD9_Gogo  | .....       | .....      | .....      | .....  | .....     | .....    | .....     | .....     | ..... | .....     | .....          |
| SAMD9_Poab  | .....       | .....      | .....      | .....  | T         | .....    | .....     | .....     | ..... | .....     | .....          |
| SAMD9_Nole  | .....       | M          | .....      | .....  | .....     | .....    | .....     | .....     | ..... | .....     | .....          |
| SAMD9_Mamu  | .....       | .....      | .....      | .....  | .....     | .....    | R         | .....     | ..... | .....     | .....          |
| SAMD9_Bota  | ED          | Q          | K          | D      | E         | S        | .....     | TS        | ..... | .....     | .....          |
| SAMD9_Susc  | E           | K          | D          | K      | .....     | C        | .....     | T         | ..... | L         | .....          |
| SAMD9_Eqca  | E           | E          | K          | .....  | EK        | .....    | S         | .....     | N     | T         | V              |
| SAMD9_Mylu  | E           | .....      | D          | K      | .....     | S        | .....     | TT        | Y     | .....     | L              |
| SAMD9_Orcu  | KEYD        | .....      | .....      | .....  | DPS       | .....    | .....     | N         | A     | .....     | L              |
| SAMD9_Rano  | .....       | V          | .....      | .....  | VT        | .....    | A         | .....     | AF    | .....     | L              |
| SAMD9_Crgr  | KH          | E          | .....      | .....  | DRK       | .....    | VA        | .....     | A     | .....     | T              |
| SAMD9_Capo  | H           | .....      | .....      | KK     | .....     | KS       | .....     | SG        | ..... | Y         | A              |
| SAMD9_Soar  | EK          | V          | .....      | D      | M         | .....    | K         | .....     | C     | .....     | E              |
| SAMD9L_Hosa | EK          | C          | N          | .....  | S         | DET      | .....     | DVDS      | Q     | I         | .....          |
| SAMD9L_Patr | EK          | C          | N          | .....  | S         | DET      | .....     | DVDS      | Q     | I         | .....          |
| SAMD9L_Gogo | EK          | C          | N          | .....  | S         | DET      | .....     | DVDS      | Q     | I         | .....          |
| SAMD9L_Poab | EK          | C          | K          | IP     | .....     | S        | DET       | .....     | DVDR  | Q         | I              |
| SAMD9L_Nole | EK          | C          | N          | .....  | S         | DET      | .....     | DVDS      | Q     | I         | .....          |
| SAMD9L_Caja | EK          | C          | N          | .....  | S         | DET      | .....     | DVDS      | VQ    | I         | .....          |
| SAMD9L_Mamu | EK          | C          | N          | .....  | S         | DET      | .....     | DVDS      | Q     | I         | .....          |
| SAMD9L_Loaf | EK          | C          | N          | .....  | S         | DDM      | .....     | VDS       | Q     | I         | .....          |
| SAMD9L_Eqca | EK          | C          | N          | .....  | S         | DEI      | L         | .....     | DADS  | TQ        | I              |
| SAMD9L_Calu | EK          | C          | N          | .....  | S         | M        | K         | .....     | VDS   | GQ        | I              |
| SAMD9L_Aime | EK          | C          | N          | .....  | L         | S        | EI        | .....     | VDS   | GQ        | I              |
| SAMD9L_Ereu | EK          | .....      | N          | .....  | S         | DEM      | .....     | G         | DGDS  | TQ        | I              |
| SAMD9L_Mumu | EK          | DC         | N          | .....  | L         | R        | DET       | K         | ..... | DVYS      | Q              |
| SAMD9L_Crgr | EKE         | C          | N          | .....  | L         | G        | DTT       | K         | ..... | K         | T              |
| SAMD9L_Rano | EKEY        | DC         | N          | .....  | L         | D        | DTT       | K         | ..... | K         | T              |
| SAMD9L_Capo | EK          | C          | N          | .....  | G         | DEK      | .....     | E         | NS    | Q         | I              |
| SAMD9L_Soar | EKE         | .....      | N          | .....  | V         | S        | DDT       | .....     | F     | ADS       | TQ             |
| SAMD9L_Modo | EKK         | E          | CR         | .....  | E         | RT       | Q         | .....     | KH    | .....     | L              |

|             | 1010                        | 1020                                     | 1030 | 1040 | 1050 | 1060 | 1070 | 1080 | 1090  | 1100 |
|-------------|-----------------------------|------------------------------------------|------|------|------|------|------|------|-------|------|
| SAMD9_Hosa  | IECGNYCGVRIIHSLIAEFSLEELKKS | YHLNKSQIMLDMLTENLFFDTGMGKSKFLQDMHTLLLTRH |      |      |      |      |      |      |       |      |
| SAMD9_Patr  |                             |                                          |      |      |      |      |      |      |       |      |
| SAMD9_Gogo  |                             |                                          |      | H    |      |      |      |      |       |      |
| SAMD9_Poab  |                             | K                                        |      |      |      |      |      | S    |       |      |
| SAMD9_Nole  |                             | K                                        |      |      |      |      |      | D    |       |      |
| SAMD9_Mamu  |                             | K                                        |      |      |      |      | N    |      |       |      |
| SAMD9_Bota  | V                           | P                                        | IR   | I    | D    | D    | T    | Y    | I     | R    |
| SAMD9_Susc  |                             | P                                        | TR   | I    | N    | D    | I    | Y    | I     | D    |
| SAMD9_Eqca  | V                           | K                                        | P    | DR   | R    | T    | D    | YE   | L     | R    |
| SAMD9_Mylu  | V                           | K                                        | P    | IR   | I    | D    | D    | W    | V     | Y    |
| SAMD9_Orcu  | L                           | M                                        | P    | SL   | N    | G    | GRC  | M    | YE    | I    |
| SAMD9_Rano  |                             | S                                        | H    | TL   | R    | N    | S    | K    | VM    | Y    |
| SAMD9_Crgr  |                             | S                                        | W    | HE   | SA   | R    | N    | S    | E     | VMN  |
| SAMD9_Capo  | E                           | T                                        | P    | IL   | D    | D    |      | Y    | L     | R    |
| SAMD9_Soar  | V                           | C                                        | P    | LR   | L    | Q    |      | R    | Y     | R    |
| SAMD9L_Hosa | A                           | Y                                        | R    | T    | P    | LYC  | K    | ER   | D     | C    |
| SAMD9L_Patr | A                           | Y                                        | R    | T    | P    | LYC  | K    | ER   | D     | C    |
| SAMD9L_Gogo | A                           | Y                                        | R    | T    | P    | LYC  | K    | ER   | D     | C    |
| SAMD9L_Poab | A                           | Y                                        | R    | T    | P    | VYC  | K    | ER   | D     | C    |
| SAMD9L_Nole | A                           | Y                                        | R    | T    | P    | LYC  | K    | ER   | D     | C    |
| SAMD9L_Caja | S                           | Y                                        | R    | T    | P    | VYC  | K    | ER   | D     | C    |
| SAMD9L_Mamu | A                           | Y                                        | R    | T    | V    | P    | LYC  | K    | ER    | D    |
| SAMD9L_Loaf | A                           | Y                                        | R    | T    | P    | IAC  | K    | E    | D     | A    |
| SAMD9L_Eqca | T                           | YRR                                      | T    | P    | ISC  | K    | E    | D    | D     | CK   |
| SAMD9L_Calu | T                           | Y                                        | R    | T    | P    | ISC  | K    | EE   | D     | C    |
| SAMD9L_Aime | A                           | F                                        | R    | T    | P    | I    | C    | K    | EN    | N    |
| SAMD9L_Ereu | A                           | Y                                        | -FP  | P    | I    | C    | K    |      | D     | R    |
| SAMD9L_Orcu | S                           | Y                                        | R    | T    | P    | IHC  | K    | EEKH | HH    | A    |
| SAMD9L_Mumu | SDY                         | R                                        | T    | I    | P    | THC  | K    | EM   | RMD   | C    |
| SAMD9L_Crgr | LDY                         | R                                        | T    | I    | P    | IHC  | K    | EM   | GMG   | C    |
| SAMD9L_Rano | SDY                         | R                                        | A    | I    | P    | IHC  | K    | EM   | HGMD  | C    |
| SAMD9L_Capo | A                           | Y                                        | R    | T    | P    | IHC  | K    | ER   | MD    | C    |
| SAMD9L_Soar | K                           | Y                                        | -K   |      | LCC  | K    | E    | Q    | DM    | R    |
| SAMD9L_Modo |                             | D                                        | KR   | DR   | V    | P    | SCC  |      | ITSEM | KR   |



|             | 1210  | 1220   | 1230            | 1240          | 1250      | 1260             | 1270           | 1280                  | 1290 | 1300   |
|-------------|-------|--------|-----------------|---------------|-----------|------------------|----------------|-----------------------|------|--------|
| SAMD9_Hosa  | QOQSE | DREYEV | --KERLYPKSKRRYD | TNYIAGYQGEIEV | GLYTIQILQ | LIPFFDNKNELSKRYM | VNFVSGSSDIPGDP | --NNEYKLALKNYIPYLTKLK |      |        |
| SAMD9_Patr  |       |        |                 |               |           |                  |                |                       |      |        |
| SAMD9_Gogo  |       |        |                 |               |           |                  |                |                       |      |        |
| SAMD9_Poab  |       |        |                 |               |           |                  |                |                       |      |        |
| SAMD9_Nole  |       |        |                 |               |           |                  |                |                       |      |        |
| SAMD9_Mamu  | Y     |        |                 |               |           |                  |                |                       |      |        |
| SAMD9_Bota  | G     | F      | Q               | T             | L         | F                | D              | I                     | I    | K      |
| SAMD9_Susc  | R     |        |                 |               |           |                  |                |                       |      |        |
| SAMD9_Eqca  | Q     | G      | F               | Q             | A         | S                | D              | I                     | I    | S      |
| SAMD9_Mylu  | YK    | D      | A               | M             | FNQ       | A                | D              | I                     | I    | N      |
| SAMD9_Orcu  | R     | G      | Q               |               |           |                  | KD             | T                     | S    |        |
| SAMD9_Rano  | T     | G      | SV              | Q             |           | K                | L              | NS                    | RQV  | I      |
| SAMD9_Crgr  | R     | T      | G               | NQ            |           | K                | D              | I                     | I    | NR     |
| SAMD9_Capo  | R     | G      | NQ              | S             | H         | A                | K              | R                     | D    | I      |
| SAMD9_Soar  | R     | YK     | R               | A             | GKFHQ     | S                | F              | KD                    | I    | I      |
| SAMD9L_Hosa | R     | TDSKN  | T               | ENWSPQ        | Q         | M                | T              | CFL                   | T    | HKE    |
| SAMD9L_Patr | R     | TDSKN  | T               | ENWSPQ        | Q         | M                | T              | CFL                   | T    | HKE    |
| SAMD9L_Gogo | R     | TDSKN  | T               | ENWSPQ        | Q         | M                | T              | CFL                   | T    | HKE    |
| SAMD9L_Poab | R     | TDSKN  | T               | ENWSPQ        | YQ        | M                | T              | CFL                   | T    | HKE    |
| SAMD9L_Nole | R     | TDSKN  | T               | ENWSPQ        | Q         | M                | T              | CFL                   | T    | HKE    |
| SAMD9L_Caja | R     | TDSKNC | T               | ETWSPQ        | Q         | G                | T              | CFL                   | T    | QKE    |
| SAMD9L_Mamu | R     | TDSKN  | T               | E             | WSPQ      | Q                | M              | T                     | CFL  | T      |
| SAMD9L_Leaf | R     | NDSKD  | P               | EVWPLQ        | YQ        | K                | M              | T                     | FL   | S      |
| SAMD9L_Eqca | E     | TDRKN  | T               | EAW           | PQ        | Q                | K              | VM                    | T    | FL     |
| SAMD9L_Calu | E     | T      | RKG             | TWADTWAKQTLQ  | K         | T                | FF             | A                     | T    | C      |
| SAMD9L_Aime | E     | A      | RKAC            | T             | EPWGPQ    | LQ               | K              | T                     | FF   | A      |
| SAMD9L_Ereu | E     | TDKKDS | T               | EAWSTQ        | LK        | EM               | T              | FL                    | A    | T      |
| SAMD9L_Orcu |       | TDSKN  | T               | EAWSAQ        | Q         | T                | FF             | T                     | HKE  | VSFLKP |
| SAMD9L_Mumu | N     | DSKD   | GT              | EAWSPQN       | Q         | F                | T              | FF                    | D    | L      |
| SAMD9L_Crgr | E     | TDNKD  | T               | EAWSPR        | Q         | T                | FF             | D                     | T    | P      |
| SAMD9L_Rano | E     | TDSDK  | I               | EVWSPQ        | Q         | T                | FF             | D                     | L    | T      |
| SAMD9L_Capo |       | TDSDK  | T               | EAWSPQ        | PQ        | T                | FL             | S                     | T    | HKE    |
| SAMD9L_Soar | E     | TDKKDC | R               | GVW           | QQRFR     | K                | M              | T                     | FL   | FA     |
| SAMD9L_Modo |       | YN     | NKDDKT          | G             | Q         | HRY              | S              | TSC                   | F    | IQI    |

|             | 1310      | 1320                                             | 1330                                          | 1340 | 1350   | 1360   | 1370        | 1380       | 1390          | 1400                          |
|-------------|-----------|--------------------------------------------------|-----------------------------------------------|------|--------|--------|-------------|------------|---------------|-------------------------------|
| SAMD9_Hosa  | FSLKKS    | FDFDEYFVLLKPRNNIKQNEEAKTRRKVAGYFKKYVDIFCLLEESQNN | TGLGSKFSEPLQVERCRRNLVALKADKFSGLLEYLIKSQEDAIST |      |        |        |             |            |               |                               |
| SAMD9_Patr  |           |                                                  |                                               |      |        |        |             |            |               |                               |
| SAMD9_Gogo  |           |                                                  |                                               |      |        | D.R.   |             | S.         |               |                               |
| SAMD9_Poab  |           |                                                  |                                               |      |        | K-DP   |             |            |               |                               |
| SAMD9_Nole  |           |                                                  |                                               | I.   | VS.    | -KD.   |             | SS.        |               | A.V.                          |
| SAMD9_Mamu  |           |                                                  | V.                                            | T.   | G.     | D-I.   |             | I.         | KS.           |                               |
| SAMD9_Bota  |           |                                                  |                                               | A.   | GPS.L. | -KDF.  | L.V.        | LY.        | S.EV.         | A.VH.                         |
| SAMD9_Susc  | D.        |                                                  | K.                                            | V.   | A.     | GPS.D. | S-KY.       | L.L.       | Q.            | S.EV.                         |
| SAMD9_Eqca  | C.RC.     | D.                                               | R.                                            | H.   | GPSV.  | -KD.   | A.L.I.      | LY.        | KS.EV.        | N.N.R.                        |
| SAMD9_Mylu  | S.        | D.                                               | S.                                            | QS.  | A.     | GPF.L. | -RD.        | QL.L.      | R.LY.         | S.EV.                         |
| SAMD9_Orcu  | D.        |                                                  | T.                                            | TC.  | R.L.   | GPSA.  | ILS-K.      | I.LS.      | QE.           | S.E.                          |
| SAMD9_Rano  | S.        | D.                                               | E.Y.                                          | S.   | M.     | E.     | GP.A.L.     | -QNFR.     | L.L.          | T.S.E.                        |
| SAMD9_Crgr  | S.        | RA.                                              | D.                                            | Y.   | S.C.S. | V.     | R.          | S.         | -QNFR.        | LTL.                          |
| SAMD9_Capo  | S.        | DA.                                              | D.                                            | H.   | VV.    | I.     | GPSG.       | L.-RD.     | EL.L.L.       | NQ.S.E.                       |
| SAMD9_Soar  | N.        | D.                                               | M.                                            | SD-  |        | G.     | D.FNGT.     | S-KDF.     | NI.LS.        | KI.LF.                        |
| SAMD9L_Hosa | SD.RC.    | ID.M.                                            | M.YTQ.                                        | EIA. | IMLSK. | SRC.R. | TEL.H.D---  | PCL.Q.     | E.QL.         | E.N.KK.E.                     |
| SAMD9L_Patr | SD.RC.    | ID.M.                                            | M.YTQ.                                        | EIA. | IMLSK. | SRC.R. | TEL.H.D---  | PCL.Q.     | E.HL.         | E.N.KK.E.                     |
| SAMD9L_Gogo | SD.RC.    | ID.M.                                            | M.YTQ.                                        | EIA. | ITLTK. | SRC.R. | TEL.H.D---  | PCL.Q.     | E.QL.         | E.N.KK.E.                     |
| SAMD9L_Poab | SD.RC.    | ID.M.                                            | M.YTQ.                                        | EIA. | ITLTK. | SRC.R. | TEL.H.D---  | PCL.Q.     | E.QL.         | E.N.KK.E.                     |
| SAMD9L_Nole | SD.RC.    | ID.M.                                            | M.YTQ.                                        | EIT. | IMLSK. | SRC.R. | TEL.H---    | PCL.Q.     | E.QL.         | E.N.KK.E.                     |
| SAMD9L_Caja | SD.RC.    | ID.M.                                            | M.YAQ.                                        | EIV. | VMLSK. | SRC.R. | TEL.H.D---  | SDQ.QN.G.  | QL.           | E.N.KK.E.                     |
| SAMD9L_Mamu | SD.RC.    | ID.M.                                            | M.YTQ.                                        | EIV. | ITLTK. | SRC.R. | TEL.H.D---  | PCL.R.     | E.QLF.        | E.N.KK.E.                     |
| SAMD9L_Loaf | LD.C.     | VD.M.                                            | T.                                            | TH.  | EIV.   | SILSK. | SR.YR.      | TE.H.G---  | LDP.Q.        | E-L.                          |
| SAMD9L_Eqca | SD.RC.    | E.AD.M.                                          | EMK.                                          | TQ.  | ETA.   | LSLTK. | ISRC.R.     | MEL.H.D--- | LG.V.Q.       | RE.QL.                        |
| SAMD9L_Calu | SD.RC.    | D.L.                                             | MK.                                           | TQ.  | ETG.   | ISLSK. | ITRC.       | EL.H.D---  | SGP.HR-E.     | QL.                           |
| SAMD9L_Aime | SD.RC.    | ND.I.                                            | QM.                                           | TQ.  | ETV.   | ISLTK. | ITRC.R.     | GEL.C.D--- | LGL.Q.        | E.QFF.                        |
| SAMD9L_Ereu | SD.RC.    | AD.M.F.                                          | T.                                            | TQ.  | ETA.   | IILSK. | SR.RQ.      | IEL.HSD--- | VGI.QN.G.     | QL.                           |
| SAMD9L_Mumu | SD.ERC.   | H.GD.                                            | MGF.                                          | TP.  | ELT.   | LLLSK. | SRC.        | EL.H.D---  | TNLVQG.       | EDLL.                         |
| SAMD9L_Crgr | SE.RC.    | LD.IG.                                           | ITP.                                          | ETT. | LSLIK. | R.     | AGL.RMN---  | TNL.QG.    | ENVL.         | E.N.KRI.                      |
| SAMD9L_Rano | SD.RC.    | LD.MG.                                           | TP.                                           | ELT. | LSLSK. | SRC.   | A.L.Q-      | -----      | QG.EDLL.      | E.N.KRIK.                     |
| SAMD9L_Capo | SD.I.C.H. | SD.M.                                            | T.                                            | FQ.  | EMT.   | L.LSK. | IFCY.T.TKL. | H.D---     | S.P.QG.       | E.QL.                         |
| SAMD9L_Soar | PD.RC.    | AD.M.F.                                          | T.                                            | TVH. | EIT.   | ISL.K. | IGHC.MS.IS. | NH.---     | LGT.TQAQENLL. | E.N.KR.EKCR.                  |
| SAMD9L_Modo | KR.ETI.   | NNLQD.                                           | SF.                                           | LKD. | E.EIV. | E.NQI. | MEKL.Q.     | LS.SNS.    | -----         | IRPSM---                      |
|             |           |                                                  |                                               |      |        |        |             |            |               | VTSV.W.E.EISN.AR.K.T.TH.N.EME |



|             | 1510             | 1520          | 1530          | 1540          | 1550        | 1560       | 1570       | 1580     | 1590    | 1600     |
|-------------|------------------|---------------|---------------|---------------|-------------|------------|------------|----------|---------|----------|
| SAMD9_Hosa  | QALKNSFKGQYKHMHR | KQPIAYFFLGKGR | LERLVHKGKIDQC | FKKTP-DINSLWQ | SGDVWKEEKVQ | ELLLRLQGRA | ENN-CLYIEY | GINEKITI | PITP    |          |
| SAMD9_Patr  |                  |               |               |               | E           |            |            |          |         |          |
| SAMD9_Gogo  |                  |               |               |               |             |            |            |          |         |          |
| SAMD9_Poab  | E                |               | E.K           |               | E           |            |            |          |         |          |
| SAMD9_Nole  | E                |               | K             |               | E.L         |            |            |          |         |          |
| SAMD9_Mamu  | E                |               | K             |               | E           |            | A          |          |         |          |
| SAMD9_Bota  | SS.E             | R.Y           | NSVN          |               | E.A         | F          | K.K        | K.VG     | H       |          |
| SAMD9_Susc  | RS.E             | R.C           | NNMN          | I.R           | C           | AA.K.F     | KE.K       | F.K      |         |          |
| SAMD9_Eqca  | RS.E             | R.C           | NNMT          |               | RN.S        |            | RN         | K        | V.D     |          |
| SAMD9_Mylu  | RS.Q             | R.Y           | NNMN          |               | YG.L        | IW         | E.K        | K        |         | R        |
| SAMD9_Orcu  | S.E              | R.Y           | NNMN          |               | E.L         |            | R          |          | VSD     | L        |
| SAMD9_Rano  | EK               | R.RLY         | NSRN          | I             | EN          | ENLS       | W.H.T.K    | E.K      | D.V     | P.K      |
| SAMD9_Crgr  | W.ET             | R.R.Y         | E.NNRN        | I             | EN          | E.VS       | W.H.K      | E.K      | D       | N.Q      |
| SAMD9_Capo  | S.EK             |               | TNMN          |               | E           | GEMS       | F          | K.E.K    | D       | EK.F     |
| SAMD9_Soar  | RL.ET            | L.K.R         | Y             | A.NIN         |             | G          | --         | N        | R.K     | D.N      |
| SAMD9L_Hosa | SS.NR            | R.R.C.S       | ASTL.Y        | R.G.NSI       | A.E.Y       | D.AQ-NT    | H          | KNE.KD   | R.T.Q   | GK-LISV  |
| SAMD9L_Patr | SS.NR            | R.R.C.S       | ASTL.Y        | R.G.NSI       | AE.E.Y      | D.AQ-NT    | H          | KNE.KD   | R.T.Q   | GK-LIS   |
| SAMD9L_Gogo | SS.NR            | R.R.C.S       | ASTL.Y        | R.G.NSI       | A.E.Y       | D.AQ-NT    | H          | KNE.KD   | R.T.Q   | GK-LIS   |
| SAMD9L_Poab | SS.NR            | R.R.C.S       | ASTL.Y        | R.G.NSI       | A.E.Y       | D.AQ-NT    | H          | KNE.KD   | R.T.Q   | GK-LIS   |
| SAMD9L_Nole | SS.NR            | R.R.C.S       | ASTL.Y        | R.G.NSI       | AE.E.Y      | D.AQ-NT    | H          | KNE.KD   | R.T.Q   | GK-LIS   |
| SAMD9L_Caja | SS.NR            | R.R.C.S       | ASTL.Y        | R.G.NSI       | AE.E.Y      | G.VH-NT    |            | KNE.KD   | R.I.Q   | GK-LIS   |
| SAMD9L_Mamu | SS.NR            | R.R.C.S       | ASTL.Y        | RRG.NSI       | AE.E.Y      | D.VQ-NT    | H          | KHE.KH   | C.I.Q   | GK-LIS   |
| SAMD9L_Leaf | SS.NR            | GR.R          | C.S           | ASTL.Y        | S.G.HSI     | AE.E.Y     | S.EQ-NT    |          | KNE.KD  | R.T.Q    |
| SAMD9L_Eqca | SS.NR            | R.SN          | C.SR          | ASTV.Y        | K.G.HS      | A.E.Y      | G.VQ-NT    | N        | EKKE.KD | C.T.Q    |
| SAMD9L_Calu | SS.NRN           | R.RS          | C.S           | ASTL.Y        | Q.G.HS      | C.AE.E.Y   | N.AQ-NTS   | S.A      | C.K     | KD.C.T.Q |
| SAMD9L_Aime | SS.NRT           | R.RS          | C.S           | ASTL.Y        | K.G.HS      | C.AE.E.Y   | N.AQ-NV    | SP       |         | KKE.KD   |
| SAMD9L_Ereu | SS.K             | NRH           | RL.C.S        | ASTL.Y        | NR.G.NS     | AE.E.Y     | IS.VK-NT   | F        | H       | K.E.KG   |
| SAMD9L_Orcu | SS.NRT           | R.R           | C.S           | ASTF.Y        | R.G.FNG     | L.AE.E.Y   | S.AQ-N     |          | KKE.KD  | H.V.Q    |
| SAMD9L_Mumu | SS.NR            | RR            | C.SR          | STL.Y         | QK.G.NS     | AE.ERY     | SEVQ-S     | F.H      | V       | EKRE.KD  |
| SAMD9L_Crgr | SS.NR            | RR            | C.S           | K.STL.Y       | QK.G.HS     | AE.ERY     | VSEVQ-NS   | F        | V       | EKRE.KD  |
| SAMD9L_Rano | SS.NR            | RR            | C.SR          | STL.Y         | QK.G.NS     | AE.ERY     | SEVQ-S     | F        | V       | EKGE.KDI |
| SAMD9L_Capo | VS.NR            | R.R           | C.S           | ASTF.Y        | TK.G.NS     | AELEKHIS   | K-NT       | F        | I       | T-E.KH   |
| SAMD9L_Soar | SS.K             | NR            | RR.C.S        | ASTL.Y        | N.G.KG      | TE.E.Y     | S.V        | -NTSI    | N       | KKE.KS   |
| SAMD9L_Modo | T.RKT            | WD            | Q.C.G         | FTH.Y         | NDRG.N      | R          | E          | QDAS-VSI | R       | R        |



|             | 1610                               | 1620 | 1630 |
|-------------|------------------------------------|------|------|
|             | .... .... .... .... .... ....      |      |      |
| SAMD9_Hosa  | AFLGQLRSGRSIEKVSFYLGFSIGGPLAYDIEIV |      |      |
| SAMD9_Patr  | .....                              |      |      |
| SAMD9_Gogo  | .....                              |      |      |
| SAMD9_Poab  | .....                              |      |      |
| SAMD9_Nole  | .....                              |      |      |
| SAMD9_Mamu  | T.....                             |      |      |
| SAMD9_Bota  | .....I                             |      |      |
| SAMD9_Susc  | .....D.....T.....VI                |      |      |
| SAMD9_Eqca  | ..F.....I                          |      |      |
| SAMD9_Mylu  | ..W.....I                          |      |      |
| SAMD9_Orcu  | ..W.....D.....I                    |      |      |
| SAMD9_Rano  | THF.....L....K..                   |      |      |
| SAMD9_Crgr  | TH.....L....K..                    |      |      |
| SAMD9_Capo  | ..F.....Q.L                        |      |      |
| SAMD9_Soar  | T.F.....QVI                        |      |      |
| SAMD9L_Hosa | VYS.P....N..R.....E.....VI         |      |      |
| SAMD9L_Patr | VYS.P....N..R.....E.....VI         |      |      |
| SAMD9L_Gogo | VYS.P....N..R.....E.....VI         |      |      |
| SAMD9L_Poab | VYS.P....N..R.....E.....VI         |      |      |
| SAMD9L_Nole | VYS.P....N..R.....E.....KVI        |      |      |
| SAMD9L_Caja | VYS.P....N..R.....E.....QVI        |      |      |
| SAMD9L_Mamu | VYS.P....N..R.....E.....VI         |      |      |
| SAMD9L_Loaf | VYS.P....GN..R.....E.....VI        |      |      |
| SAMD9L_Eqca | VYS.P.Q...N..R.....ME.....VI       |      |      |
| SAMD9L_Calu | VYS.P....GN..R.....ME.LQ..E...I    |      |      |
| SAMD9L_Aime | VYS.P....GN..R....A...E..Q.....I   |      |      |
| SAMD9L_Ereu | VYS.P....N.QR.....ME.....VI        |      |      |
| SAMD9L_Orcu | VYS.P....N.....E.....V.            |      |      |
| SAMD9L_Mumu | VYSAP....N..R.....E.....G.KVI      |      |      |
| SAMD9L_Crgr | VYS.P....N..R.V.....E.....G.KVI    |      |      |
| SAMD9L_Rano | VYS.P....N..R.....E.....G.KVI      |      |      |
| SAMD9L_Capo | ..F.....Q.L                        |      |      |
| SAMD9L_Soar | VYS.P....H.QS.....ME.....LI        |      |      |
| SAMD9L_Modo | .V....R.Q.M.R.....TA..V....KNI     |      |      |
