# Supplementary material for: Evolution and divergence of the mammalian SAMD9/SAMD9L gene family
Source: PubMed Central journal article supplement (PMC3685527; doi:10.1186/1471-2148-13-121), 2013-06-12
Supplement: 1471-2148-13-121-S2.pdf [file 1471-2148-13-121-S2.pdf]

**Table S1: Detection of recombination breakpoints from *SAMD9* and *SAMD9L* genes alignment using GARD analysis**

| <b><i>SAMD9+SAMD9L</i> alignment</b> |                               |                                    |                               |                                    |
|--------------------------------------|-------------------------------|------------------------------------|-------------------------------|------------------------------------|
| Breakpoint                           | LHS <sup>a</sup> Raw <i>p</i> | LHS <sup>a</sup> adjusted <i>p</i> | RHS <sup>b</sup> Raw <i>p</i> | RHS <sup>b</sup> adjusted <i>p</i> |
| 1179                                 | 0.94650                       | 1.00000                            | 0.00010                       | 0.00060                            |
| 2404                                 | 0.00010                       | 0.00060                            | 0.40590                       | 1.00000                            |
| <b>4755</b>                          | <b>0.00010</b>                | <b>0.00060</b>                     | <b>0.00010</b>                | <b>0.00060</b>                     |

<sup>a</sup>LHS: segment to the left of the breakpoint

<sup>b</sup>RHS: segment to the right of the breakpoint
