# Supplementary material for: Evolution and divergence of the mammalian SAMD9/SAMD9L gene family
Source: PubMed Central journal article supplement (PMC3685527; doi:10.1186/1471-2148-13-121), 2013-06-12
Supplement: 1471-2148-13-121-S6.pdf [file 1471-2148-13-121-S6.pdf]

```

                210      220      230      240      250      260      270      280      290      300
SAMD9L_Hosa  KALTNTETATEVDIKMKFSNEVFRFASACMNSRTNGTIHFGVKDKPHGEIVGVKITSKAAFIDHFNVMIKKYFESEINEAKKCIREPRFVEVLLQNNTP
SAMD9L_Patr  .....
SAMD9L_Gogo  .....
SAMD9L_Poab  .....A.N.....N.S.....R.....
SAMD9L_Nole  .....A.....N.....
SAMD9L_Caja  .....R..E.....L.....N...DV.....L.....D.....
SAMD9L_Mamu  .....A.....D.....L.....Q.....M.....
SAMD9L_Loaf  .....D...K.H.....VA.DD.N...L...Q...D.D.K.E...Q...Q...
SAMD9L_Eqca  .....K.....A.....N.....V.DS...Q...KV.....
SAMD9L_Calu  .....A.K.....NR..Q...VAN.D.....I.RQ.....V.....L.....
SAMD9L_Aime  .....A.K.....N...Q...V.D.....RQ.GN.....
SAMD9L_Ereu  .....K.....L.....VR.D.....L...Q...K.....Y...
SAMD9L_Orcu  .....AA..E.....S.DVL.N.....D.D.....SM.....
SAMD9L_Mumu  ..F..KK..E.....T..A.....QV...DI.VN...T.T...D..S.RA.....Q.....
SAMD9L_Crgr  .....E.....I.....H.....P.DV.V...K.....D.D.K.RE.....
SAMD9L_Rano  ..F.....QEQM...T..A...T.....QV..DI.N...T...D.D.H.RA.....L..Q.....
SAMD9L_Capo  .....N..E.L...T.....V.D.....L.....S.Q...Q...ID.....L.....
SAMD9L_Soar  .....SVE.K.....L..Q...V.R.DS...K..H..D..K.R.....S.....

```

```

                310      320      330      340      350      360      370      380      390      400
SAMD9L_Hosa  SDRFVIEVDTI PKHSICNDKYFYIQM QICKDKIWKQNONLSLFVREGASSRDILANSKQRDVFKAFLQNLKSLVASRKEAEEYGMKAMKKESEGLKLV
SAMD9L_Patr  .....
SAMD9L_Gogo  .....I.....
SAMD9L_Poab  .....I.....K.....T.....I.....
SAMD9L_Nole  .....IN...K.....T.....
SAMD9L_Caja  .....I.I...V.K.M.C.R.SYT.K...K.S.....DPNK.....E.....R...K.....
SAMD9L_Mamu  .....I..Y..K.....F.....S.....T.....
SAMD9L_Loaf  ..K.....V.R.V.K...N...GS.R.DKDY...Y...K...VR..A...TL.FE.V.....V.N.....A.....
SAMD9L_Eqca  .....V.....KE...K.N.NEK...EDH...D...K...G...T...T...T...EV.N...Q...
SAMD9L_Calu  .....V...V.EK...L.R.N.SET.P.D...D.P.K...V...ELNL...T.V.....E...DR...Q...
SAMD9L_Aime  .....V..Y.V.GE...L.R.S.NET.P.D...D.P.K...V...IAY.E.S.F.VAT..V...EV.N...Q...
SAMD9L_Ereu  .....V...V...KE...TN.SY.NDT...ES...D...V...G...KN.T...AED..D.K.HE...N...C...Q..I.....
SAMD9L_Orcu  .....V...V.KE...K.S.NV...EY..I.....A...P...T.....R.T.....
SAMD9L_Mumu  .N.....V.R...QE...M.SSTG.T...SKDT...KN.G.PN...RE.K.ED.MWT...A...LR.-VT.....S.....
SAMD9L_Crgr  .....V...V...KE...I.SYT.T...SKENC...T.KN...A...RE.RK.E.AWT...QQR.-VT.....A.....
SAMD9L_Rano  .N.....V...V...QE...VML.T.TGTT...SKDT...G.P...RE.K.E.MSI...A...CMV-VS.D...S.....
SAMD9L_Capo  .....I..Y.V.KE...KL.SLT.T...D...K...V.R.EIE...YE...CA.A.D...HQ.TT.R.....
SAMD9L_Soar  .....V...V...QE...TK.EL.G...TE.T...TK...ERT.AG...D...ITM...KDEV.VN.Q...Q..I.....

```

```

          410          420          430          440          450          460          470          480          490          500
.....|.....|.....|.....|.....|.....|.....|.....|.....|.....|.....|
SAMD9L_Hosa KLLIGNRDSLNSYYDWYILVTNKCHPNQIKHLDLFLKEIKWFAVLEFDPESMINGVVKAYKESRVANLHFPNOYEDKTTNMWEKISTLNLQOPSWIFCN
SAMD9L_Patr .....R.....
SAMD9L_Gogo .....R.....
SAMD9L_Poab .....R.....
SAMD9L_Nole .....V.....Q.....R.....
SAMD9L_Caja ..T.....I.....QS.....R.....M.....R.....A.....
SAMD9L_Mamu .....V.....R.....A.....
SAMD9L_Loaf .....S.....D.....S.....T.....VSK.....D.....K.AATIR.M.F.....E.....
SAMD9L_Eqca .....N.....I.....T.N.....QSK.A.F.K.....S.E.S.P.R.....S.....
SAMD9L_Calu .....N.....T.N.....M.L.....VSK.....K.I.....F.E.N.I.R.....S.....T.....
SAMD9L_Aime .....S.....T.N.....M.....VSK.....K.....F.E.SN.IR.....S.....E.....
SAMD9L_Ereu .....Q.....N.....N.S.R-----ESK.A.T.R.....-AE...T.R...SXS.W-----
SAMD9L_Orcu .....S.....T.....G.....S.....SSLR.....V.....
SAMD9L_Mumu ..TRHQG..E.....T.A.T.LE.E.I.M.L...D...Y.H.K...R...I...L.SH.E.-TIA...K.E.....
SAMD9L_Crgr ..TRHQG.....N.A...E.....L...D...Y.Q.K...R...I...L.S.E.-STIE...K.FE.....
SAMD9L_Rano ..TRHQG..K.....S.V.T.ME...I...L...D...Y.H.K...R.....L.SH.E.-TIE...K.E.....
SAMD9L_Capo .....NS.....MQ.....R.....A...QK...M.....E.K.T.RQ...S...E.T.....
SAMD9L_Soar .....S...N.....T.Y.....S...D...VSK...VFQ.....S...VEGKSTQN.TVCS...T.....

```

```

          510          520          530          540          550          560          570          580          590          600
.....|.....|.....|.....|.....|.....|.....|.....|.....|.....|.....|
SAMD9L_Hosa GRSDLKSETYKPLEPHLWQRERASEVRKLILFLTDENIMTRGKFLVVFLLLSSVESPGDPLIETFWAFYQALKGMENMLCISVNSHIYQRWKDLLQTRMK
SAMD9L_Patr .....
SAMD9L_Gogo .....H.....
SAMD9L_Poab .....H.....
SAMD9L_Nole .....Y.....
SAMD9L_Caja .....A.....R.....FT...V.....S.....N
SAMD9L_Mamu .....
SAMD9L_Loaf .....NN...D.....K.....F.....C.....I...C.K.Q.....R...LT
SAMD9L_Eqca ..T...D.RH.....I...Q...V...R...A.....S.C.....C...Q.....LT
SAMD9L_Calu .....N.S.....H.....P.....C.....I...C.....LT
SAMD9L_Aime .....N.S.....H.....C.....I...C...Q.....LT
SAMD9L_Ereu -----RQ..E...GRA..NY.....P.....P.CT.FKV.N.Q.IM.C.TPQ.....FV
SAMD9L_Orcu .....T...F.....F...A.....C.....C...Q.....K...LT
SAMD9L_Mumu ..V...--SCQ.....D...G.R.S.....IVK.V...PI.NQK.....C...VFN.D...C...A...Q.S...V.LE
SAMD9L_Crgr ..L...NDSCQ.....D...G.R.S.....V.V...P.NNQK.....C...VFN.D...C.P...S...V.LE
SAMD9L_Rano ..V...--SCQ.....D...G...S...G.IA.V...P.NQK...L...C...VFN.D...C.PS...Q.S...V.LE
SAMD9L_Capo .....QN...A...D.C...S...L.AK...L...FT.C...R...C...K...LT
SAMD9L_Soar .....GAV.....NKN...T.....S.A.....P.....CV.K.N...I...C.LD.KQ...KA.LI

```

```

        610         620         630         640         650         660         670         680         690         700
SAMD9L_Hosa MEDELTNHSISTLNIELVNSTILKLSVTRSSRRFLPARGSSSVILEKKKEDVLTALEILCENECTETDIEKDKSKFLEFKKSKEEHFYRGGKVSWWNFY
SAMD9L_Patr .....
SAMD9L_Gogo .....
SAMD9L_Poab .....
SAMD9L_Nole .....Q.....H.....KD.....E.....C.....
SAMD9L_Caja I.....S.....Q.....H.....K.....A.....RD.....E.....R.....
SAMD9L_Mamu .....Q.....RD.....E.....
SAMD9L_Loaf IA.....L.QI.....IQ.....S.....E.LF.....KD.....R.....R.....
SAMD9L_Eqca VA..A.....L.I.....P.E.....SS.L.....E.I.....RD.....EF.Q.....KY.....
SAMD9L_Calu IA.....L.I.....P.Q.L.....SH.F.I.....E.I.....KD.....Q.....L.....
SAMD9L_Aime AA.....L.I.....P.Q.....SH.FA.....E.T.....KD.....E.Q.....T.....
SAMD9L_Ereu .S.....SL.L.....Q.K.....S.....E.F.....GD.....EC.E.R.....
SAMD9L_Orcu VAH..S.....L.....S.....T.....RD.....E.....
SAMD9L_Mumu IK.D.AK.....N.....IQ.....SC.....MD.IMS.....KD.....E.Q.....R.....R.....
SAMD9L_Crgr IKG..AE.....Q..N.....IQ.....SC.....IE.T.....RD.....NE.E.K.LR.....RA.....
SAMD9L_Rano IK.D.AK.....IQ.....SC.....MD.IMS.....RD.....E.Q.....LR.....R.....
SAMD9L_Capo IG..SK..V.....I.....L.Q..K..SY.....E.L..Q..S..K.....R..R.....
SAMD9L_Soar E.S..ED.T...L.FL.....K..SK...T...E.TF.T...KD...NA..Q..I..N..Q..S.....

```

```

        710         720         730         740         750         760         770         780         790         800
SAMD9L_Hosa FSSSENYSSDFVKRDSYEKLDLIHCWAESPKPIFAKIINLYHHPGCGGTTLAMHVLWDLKKNFRCAVLKKNKTTDFAEIAEQVINLVTYRAKSHQDYIPVL
SAMD9L_Patr .....
SAMD9L_Gogo .....V.....
SAMD9L_Poab .....R.....
SAMD9L_Nole .....K.....
SAMD9L_Caja .....P.....Q.L.....EK.....V.G.TS..K.....
SAMD9L_Mamu .....Q.....G.....K.....
SAMD9L_Loaf .....A.....H.....Q.....V.....N.....A.T.GD.T.I.K.T..E.....
SAMD9L_Eqca .....A.....L.R.Q..P..V.....N.....A..G..TS.I.K.T.....
SAMD9L_Calu .....A.....V.K.....E.....N.....E.V..TK.I.K.T.E.F...
SAMD9L_Aime .....A.....Q..D..V.....N.....S.....G.V..TK.I.K.T.PE..F...
SAMD9L_Ereu .....I..R..E.RS..ED...V.....N.....FR.K.....A..G..T..IA.K.S.Y.....
SAMD9L_Orcu .....A.....KE.N.Q..R.V.....A.....G..T..I.K.TC.....
SAMD9L_Mumu .....A.....F.E.TT.QQC.D..V.V.V.....QK.....A..V.G..SK.MS.K.T..E.F...
SAMD9L_Crgr .....A.....G.E.TT.QQC.D..E.V..V.....K.....A..L.G..SK.IS.K.T.....
SAMD9L_Rano .....A.....NF.E.TT.QQC.D..V..V.....QK.....A..I..G..SK.IS.K.S.....
SAMD9L_Capo .....A.....M.KN...ERC.C.E.....I..QKY.....AI.E.VG..I.H..K.T.....
SAMD9L_Soar .....HT.A...R.N.K.ED...L.....N..E.R.K.....I.A...G..TK.I.K.S.....

```

```

      810      820      830      840      850      860      870      880      890      900
SAMD9L_Hosa LLVDDFEEQENVYFLQNAIHSVLAEKDLRYEKTlVIILNCMRSRNPDESAKLADSIAlNYQLSSKEQRAFgAKLKEIEKQHKNCENFYsFMIMKSNFDET
SAMD9L_Patr .....
SAMD9L_Gogo .....
SAMD9L_Poab .....L.....K.IP.....
SAMD9L_Nole .....T.....
SAMD9L_Caja .....I.V.....N.....Q.....S.....
SAMD9L_Mamu .....
SAMD9L_Loaf .....L.ICI.D.N.S.K.G.....Q.R.S.V.K.P.E.E.....DM
SAMD9L_Eqca .....P.CV.QTIF.....Q.S.Y.MHR.P.D.....I
SAMD9L_Calu .....D.CV.D.I.G.G.....Q.T.V.T.....E.E.....NKM
SAMD9L_Aime .....D.V.D.I.G.....Q.T.V.T.P.E.E.....L.N.I
SAMD9L_Ereu .....FV.I.....Q.D.V.K.P.K.ST.....F.....M
SAMD9L_Orcu .....I.N.I.....Q.I.K.P.E.D.....L.R.....
SAMD9L_Mumu .....A.I.NAFI.G.....Q.N.S.K.P.E.Q.E.....L.G.T
SAMD9L_Crgr .....T.I.T.N.FI.G.....Q.A.S.K.P.E.Q.E.....ML.GS.ET.
SAMD9L_Rano .....Q.T.I.N.FI.GV.....Q.S.K.P.K.E.Q.EY.D.....L.D.T
SAMD9L_Capo .....I.I.KR.Q.V.....Q.Q.S.K.A.A.E.E.....G.K
SAMD9L_Soar .....L.N.D.S.V.....Q.E.TN.L.R.E.F.V.D.

```

```

      910      920      930      940      950      960      970      980      990      1000
SAMD9L_Hosa YIENVVRNlIKGQDVDSKEAQLISFLALLSSyVTDSTISVSQCEIFLGIITSTPWEPEsLEDKMGTYSTLLIKTEVAEYGRyTGVRIIHPLIALyCLKE
SAMD9L_Patr .....
SAMD9L_Gogo .....
SAMD9L_Poab .....R.....N.....V.....
SAMD9L_Nole .....N.....N.....
SAMD9L_Caja .....V.....N.....S.....V.....
SAMD9L_Mamu .....N.....N.....IN.....F.....TSAR.....T.....IA.....
SAMD9L_Loaf .....N.....N.....IN.....F.....TSAR.....T.....IA.....
SAMD9L_Eqca .....L.....A.T.....N.I.....MC.I.V.N.A.N.T.R.....IS.....
SAMD9L_Calu .....K.....N.G.....N.E.....M.....A.N.T.....IS.....
SAMD9L_Aime .....N.....G.....N.....D.A.N.F.....IF.....
SAMD9L_Ereu .....G.....G.T.....N.....P.....T.IK.KQ.....NADI.-FP.....IF.....
SAMD9L_Orcu .....K.....Y.....NT.....K.....N.S.....IH.....
SAMD9L_Mumu .....K.K.T.DL.AK.RR.....Y.N.....T.KKYGK.TV.KN.....R.SD.I.....TH.....
SAMD9L_Crgr .....K.K.T.DL.IH.RR.....Y.N.L.....NKHGK.V.N.V.R.LD.I.....IH.....
SAMD9L_Rano .....K.K.T.DL.AH.RK.F.Y.NT.I.....T.IKRGK.TV.N.R.SD.A.I.....IH.....
SAMD9L_Capo .....K.K.T.DL.AH.RK.F.Y.NT.I.....T.IKRGK.TV.N.R.SD.A.I.....IH.....
SAMD9L_Soar .....F.NA.T.Y.N.....P.....RH.PS.V.I.....I.K.-K.S.C.....

```

```

1010      1020      1030      1040      1050      1060      1070      1080      1090      1100
.....|.....|.....|.....|.....|.....|.....|.....|.....|.....|
SAMD9L_Hosa LERSYHLDKCOIALNILEENLFYDSGIGRDKFOHDVQTLTLLTRQRKVYGDDEDTLFSPLMEALQNKD-IEKVL SAGSRRFPQNAFICQALARHFYIKEKD
SAMD9L_Patr .....E.....-.....
SAMD9L_Gogo .....E.....-.....
SAMD9L_Poab .....E.....-.....
SAMD9L_Nole .....E.....-.....
SAMD9L_Caja .....K.....V...RE.....-M.....
SAMD9L_Mamu .....D.....E.....-.....
SAMD9L_Loaf ..K....S....L.R.K..V...E.L....RE.....I...P.SK-.N..T..IQ.....Y.....
SAMD9L_Eqca ..K..D...K..K.K...Q.....EH.....I...EE-...VE.I.....K
SAMD9L_Calu ..E..D.N....K.N...V...E....RE.....A.I...E.-...I..AT.....Y....N
SAMD9L_Aime ..N..N.N....K.K.D.V...E....E.....A.I...E.EE-...M.TL.....Y....N
SAMD9L_Ereu ..KK....SR...KL.S...N...K.....G.G...-M...ID-.XXX-XXXXXXXX.N.....-L..H.RN
SAMD9L_Orcu ..EKH..N.HH..KL.N...F.....R.E.....I.D...E-.E.V..CS.....N
SAMD9L_Mumu ..M..RM....M...VL...L...KY.....EH.A....I.E...EE-T...I..D.....N
SAMD9L_Crgr ..M..GMG...T...KV.....K.....EH.A...R...I.E.K.EE-T..I.TV.D.....N
SAMD9L_Rano ..M.HGM....M...I.....K.....EH.A.I...FI.E...EQ-T...T..D.....L..N
SAMD9L_Capo .....M.....N.TV.....E.A.....I.T.K.EE-VK...TR.S...E.....N
SAMD9L_Soar ..K..Q..MSR...M.R.K...K.....H..EH.....I.D.K.E.IV.N..T..N...K.....K.N

```

```

1110      1120      1130      1140      1150      1160      1170      1180      1190      1200
.....|.....|.....|.....|.....|.....|.....|.....|.....|.....|
SAMD9L_Hosa FNTALDWARQAKMKAPKNSYISDTLQVYKSEIKWLDGNKNCRSITVNDLTHLLEAAEKASRAFKESQRQTD SKNYET--ENWSPQKSQRRYDMYNTAC
SAMD9L_Patr .....-.....-.....
SAMD9L_Gogo .....-.....-.....
SAMD9L_Poab .....-.....-.....Y.....
SAMD9L_Nole .....H.....-.....-.....
SAMD9L_Caja .....C.....E...N...SQ.....C...-T.....GT.....
SAMD9L_Mamu .....-.....-.....E.....
SAMD9L_Loaf ....H..N...KI.....V...K...E.T.EV.K...F.T...G.....N..D..P--V.PL.Y.K.....G
SAMD9L_Eqca ..I..E..E..QKR.....H..K...GE...KD...F...K.E.R...--A.L...K.V...G
SAMD9L_Calu ..G...E..N...K.....Q...E...STD...IC...N.K...K.E.ER.G...WADT.AK.TL.K.T...G
SAMD9L_Aime ..S.....NE.K.....R...R..EM.AKD...IC...N.K...K.E.AER.AC.--P.G..L.K.T...G
SAMD9L_Ereu .....Y...R.....N.V...E.RS.KE..ID..M.C.D...T.E...K.DS.--A.T...LK.E...G
SAMD9L_Orcu ..E...E.NL..TR.....K...E...SKV..K...G...Q.....--A.A...T...G
SAMD9L_Mumu ..S...V..NL..R.....L.Q..GK..T.GN.S.D..AYF..V...K...N.S...D.G--A...N...TF...G
SAMD9L_Crgr ..S...V..NL..R.....Q..GK.E..L.S.D...I...TK...E..N.D.--A..R...T...G
SAMD9L_Rano ..S...V..N...R.....RQ...-----KV...K...E...D..I--V.....T...G
SAMD9L_Capo ..D..T..NL..ER.....C-----T.G.A..R...Q...D...--A...P...T...G
SAMD9L_Soar ..D...F..T...T...N.....EK...KI.SAS...YF.....K...M.E...K.DC.R--GV.LQ.RFR.K.....G

```

```

1210      1220      1230      1240      1250      1260      1270      1280      1290      1300
.....|.....|.....|.....|.....|.....|.....|.....|.....|.....|.....|
SAMD9L_Hosa FLGEIEVGLYTIQILQLTPFFHKENELSKKHMVQFLSGKWTIPDPDRNECYLALSKEFTSHLKNLQSDLKRCFDFFIDYMLLKMRYTQKEIAEIMLSKKV
SAMD9L_Patr .....|.....|.....|.....|.....|.....|.....|.....|.....|.....|.....|
SAMD9L_Gogo .....|.....|.....|.....|.....|.....|.....|.....|.....|.....|.....|
SAMD9L_Poab .....|.....|.....|.....|.....|.....|.....|.....|.....|.....|.....|
SAMD9L_Nole .....|.....|.....|.....|.....|.....|.....|.....|.....|.....|.....|
SAMD9L_Caja .....|.....|.....|.....|.....|.....|.....|.....|.....|.....|.....|
SAMD9L_Mamu .....|.....|.....|.....|.....|.....|.....|.....|.....|.....|.....|
SAMD9L_Loaf .....|.....|.....|.....|.....|.....|.....|.....|.....|.....|.....|
SAMD9L_Eqca .....|.....|.....|.....|.....|.....|.....|.....|.....|.....|.....|
SAMD9L_Calu .F.....|.....|.....|.....|.....|.....|.....|.....|.....|.....|.....|
SAMD9L_Aime .V.....|.....|.....|.....|.....|.....|.....|.....|.....|.....|.....|
SAMD9L_Ereu .....|.....|.....|.....|.....|.....|.....|.....|.....|.....|.....|
SAMD9L_Orcu .F.....|.....|.....|.....|.....|.....|.....|.....|.....|.....|.....|
SAMD9L_Mumu .F.....|.....|.....|.....|.....|.....|.....|.....|.....|.....|.....|
SAMD9L_Crgr .F.....|.....|.....|.....|.....|.....|.....|.....|.....|.....|.....|
SAMD9L_Rano .F.....|.....|.....|.....|.....|.....|.....|.....|.....|.....|.....|
SAMD9L_Capo .....|.....|.....|.....|.....|.....|.....|.....|.....|.....|.....|
SAMD9L_Soar .....|.....|.....|.....|.....|.....|.....|.....|.....|.....|.....|

```

```

1310      1320      1330      1340      1350      1360      1370      1380      1390      1400
.....|.....|.....|.....|.....|.....|.....|.....|.....|.....|.....|
SAMD9L_Hosa SRCFRKYTELFCHLDPCLLQSKESQLLQEEENCRKKLEALRADRFAGLLEYLNPNYKDA-TTMESIVNEYAFLQONSKKP---MTNEKQNSILANIILS
SAMD9L_Patr .....|.....|.....|.....|.....|.....|.....|.....|.....|.....|.....|
SAMD9L_Gogo .....|.....|.....|.....|.....|.....|.....|.....|.....|.....|.....|
SAMD9L_Poab .....|.....|.....|.....|.....|.....|.....|.....|.....|.....|.....|
SAMD9L_Nole .....|.....|.....|.....|.....|.....|.....|.....|.....|.....|.....|
SAMD9L_Caja .....|.....|.....|.....|.....|.....|.....|.....|.....|.....|.....|
SAMD9L_Mamu .....|.....|.....|.....|.....|.....|.....|.....|.....|.....|.....|
SAMD9L_Loaf ..YY.....|.....|.....|.....|.....|.....|.....|.....|.....|.....|.....|
SAMD9L_Eqca .....|.....|.....|.....|.....|.....|.....|.....|.....|.....|.....|
SAMD9L_Calu T..K..V.....|.....|.....|.....|.....|.....|.....|.....|.....|.....|.....|
SAMD9L_Aime T.....|.....|.....|.....|.....|.....|.....|.....|.....|.....|.....|
SAMD9L_Ereu ..Y..Q..I.....|.....|.....|.....|.....|.....|.....|.....|.....|.....|.....|
SAMD9L_Orcu ..YK..RD.....|.....|.....|.....|.....|.....|.....|.....|.....|.....|.....|
SAMD9L_Mumu .....|.....|.....|.....|.....|.....|.....|.....|.....|.....|.....|
SAMD9L_Crgr A.Y.K..AG.....|.....|.....|.....|.....|.....|.....|.....|.....|.....|.....|
SAMD9L_Rano .....|.....|.....|.....|.....|.....|.....|.....|.....|.....|.....|
SAMD9L_Capo IF.YKT..K.....|.....|.....|.....|.....|.....|.....|.....|.....|.....|.....|
SAMD9L_Soar GH..MS..ISI.N.....|.....|.....|.....|.....|.....|.....|.....|.....|.....|.....|

```

```

1410      1420      1430      1440      1450      1460      1470      1480      1490      1500
.....|.....|.....|.....|.....|.....|.....|.....|.....|.....|.....|
SAMD9L_Hosa CLKPNSKLIQPLTTLKKQLREVLFQVGLSHQYPPGYFLACLLEFPENQELDQDSKLIKQYVSSLNRSFRGQYKRMCRSKQASTLFLYLGKRRKGLNSIVHKA
SAMD9L_Patr .....
SAMD9L_Gogo .....
SAMD9L_Poab .....F.....P.....
SAMD9L_Nole .....K.....C.....
SAMD9L_Caja .....S.....N.....N.....H.....F.....
SAMD9L_Mamu .....S.RF.....M.....D.....R.....
SAMD9L_Loaf .....S.Y.R.FNI.....EL.EPT.....D.....M.....GR.RH.....S.H.....
SAMD9L_Eqca .....T.S.....SK.....Q.....HI.PR.....D.....L.....E.Q.M.....KR.SN.....R.....V.....K.H.L.....
SAMD9L_Calu .....H.F.....PI.....LSI.P.....N.....Q.....E.FM.....N.KR.RS.....Q.....H.L.C.....
SAMD9L_Aime .....H.S.....SI.....L.....A.LSI.P.Y.....D.....E.....M.....T.KR.RS.....K.H.L.C.....
SAMD9L_Ereu .....F.....D.....L.EINR.....D.....D.....M.....KK.NRH.RL.....N.....L.....
SAMD9L_Orcu .....T.S.....NM.....L.H.SD.....M.....T.....F.....F.GL.L.....
SAMD9L_Mumu .....S.Y.L.FS.....K.....I.....T.S.D.....K.....E.T.....R.H.....R.P.....QK.....L.....
SAMD9L_Crgr .....S.Y.L.FN.TK.....EL.G.P.D.....K.....T.....R.H.....KP.....QK.H.L.....
SAMD9L_Rano .....S.H.L.FS.....K.....I.....T.S.D.....K.....S.....R.H.....R.P.....QK.....L.....
SAMD9L_Capo .....V.....F.....SI.Q.....L.NY.....D.....K.....M.....V.....F.....TK.....L.....
SAMD9L_Soar .....N.....VF.E.D.....EL.....LAK.D.S.D.F.....EV.....Q.L.....KK.NR.R.....NG..KGL...T

```

```

1510      1520      1530      1540      1550      1560      1570      1580      1590
.....|.....|.....|.....|.....|.....|.....|.....|.....|.....|.....|
SAMD9L_Hosa KIEQYFDKAQNTNSLWHSQDVWKKNEVKDLLRRLTGQAEGLISVEYGTTEKIKIPVISVYSGPLRSGRNIERVSYFLGFSIEGPLAYDIEVI
SAMD9L_Patr E.....I.....
SAMD9L_Gogo .....I.....
SAMD9L_Poab .....I.....
SAMD9L_Nole E.....I.....T.....K.....
SAMD9L_Caja E.....G.VH.....Q.....I.....I.....K.....Q.....
SAMD9L_Mamu E.....V.....H.H.C.I.....I.....
SAMD9L_Loaf E.....S.E.....Q.....V.....I.....R.....G.....
SAMD9L_Eqca .....G.V.....QN.....E.K.....C.....R.I.....K.....Q.....M.....
SAMD9L_Calu E.....N.....S.SQ.A.C.-K.....C.....M.....K.V.....P.....G.....M.IQ.E.I.....
SAMD9L_Aime E.....N.....V.....SP.....K.....C.....M.....K.....P.....G.....A.....Q.....I.....
SAMD9L_Ereu E.....IS.VK.....F.Q.H.....E.G.....NR.....LM.....Q.....M.....
SAMD9L_Orcu E.....S.....I.....Q.....K.....H.V.....I.....T.....K.....V.....
SAMD9L_Mumu E.....R.SEV.DS.F.....V.E.R.....L.D.....L.....A.....T.....A.....G.K.....
SAMD9L_Crgr E.....R.VSEV.S.F.Q.V.E.R.....L.D.....A.....T.....V.....G.K.....
SAMD9L_Rano E.....R.SEV.DS.F.Q.V.E.G.....I.L.D.....L.....A.....T.....G.K.....
SAMD9L_Capo EL.KHIS.TK.....F.Q.....I.T.....H.H.....I.IN.T.ITPAFF.Q.....S.K.....G.....QIL
SAMD9L_Soar E.....S.VP.SI.QN.....K.S.C.....IQ.....N.....H.QS.....M.....L.....

```
