# Supplementary material for: Evolution and divergence of the mammalian SAMD9/SAMD9L gene family
Source: PubMed Central journal article supplement (PMC3685527; doi:10.1186/1471-2148-13-121), 2013-06-12
Supplement: 1471-2148-13-121-S9.pdf [file 1471-2148-13-121-S9.pdf]

**Table S2: *SAMD9* and *SAMD9L* likelihood ratio test (LRT) for PARRIS analysis from HyPhy software**

| Hypothesis           |                        | LRT              |    |                |
|----------------------|------------------------|------------------|----|----------------|
| Null Hypothesis      | Alternative Hypothesis | -2 $\Delta\ln L$ | df | p Value        |
| <b>PARRIS</b>        |                        |                  |    |                |
| <b><i>SAMD9</i></b>  |                        |                  |    |                |
| M1: no selection     | M2: selection          | 0.2              | 2  | n.s.           |
| <b><i>SAMD9L</i></b> |                        |                  |    |                |
| M1: no selection     | M2: selection          | 8.4              | 2  | < <b>0.05*</b> |

\*, significant; n.s., not significant
