# Supplementary material for: Evolution and divergence of the mammalian SAMD9/SAMD9L gene family
Source: PubMed Central journal article supplement (PMC3685527; doi:10.1186/1471-2148-13-121), 2013-06-12
Supplement: 1471-2148-13-121-S10.pdf [file 1471-2148-13-121-S10.pdf]

**Table S3: Positively-selected codon positions in *SAMD9* and *SAMD9L* determined by six different Maximum Likelihood methods**

|                      | <i>SAMD9</i>                                                                                                                                                                                                                                                                                                                                                                                                                                                                                                                                                                     | <i>SAMD9L</i>                                                                                                                                                                                                                                                                                                                                                                                                                                                                                                                                                                                |
|----------------------|----------------------------------------------------------------------------------------------------------------------------------------------------------------------------------------------------------------------------------------------------------------------------------------------------------------------------------------------------------------------------------------------------------------------------------------------------------------------------------------------------------------------------------------------------------------------------------|----------------------------------------------------------------------------------------------------------------------------------------------------------------------------------------------------------------------------------------------------------------------------------------------------------------------------------------------------------------------------------------------------------------------------------------------------------------------------------------------------------------------------------------------------------------------------------------------|
| PAML M8 <sup>a</sup> | 21*, <b>48*</b> , 52, <b>88</b> , <b>491</b> , 736, <b>1006*</b> , 1085**, 1088, <b>1116*</b> , 1120*, <b>1258*</b> , 1348, 1380, <b>1398*</b> , 1440                                                                                                                                                                                                                                                                                                                                                                                                                            | 71**, 126**, 146*, <b>156</b> , <b>260</b> , <b>267*</b> , 329*, <b>340**</b> , <b>357*</b> , 368*, <b>452**</b> , <b>586*</b> , 639, <b>653*</b> , 1145*, 1183, <b>1276*</b> , 1295**, 1318*, 1339, 1380*, 1408*                                                                                                                                                                                                                                                                                                                                                                            |
| SLAC <sup>b</sup>    | <b>352</b> , <b>383</b> , <b>491*</b> , <b>513</b> , <b>731</b> , <b>1006*</b> , <b>1116</b> , <b>1320*</b> , <b>1329</b> , <b>1398*</b>                                                                                                                                                                                                                                                                                                                                                                                                                                         | <b>156</b> , <b>267*</b> , <b>340**</b> , <b>362*</b> , <b>586*</b> , <b>606</b> , <b>776*</b> , <b>978*</b> , 1018, <b>1186</b> , <b>1229</b> , <b>1429</b> , <b>1474</b>                                                                                                                                                                                                                                                                                                                                                                                                                   |
| FEL <sup>b</sup>     | 38, 45*, 75*, <b>88*</b> , 151, 170*, 176, <b>279*</b> , <b>331</b> , <b>352*</b> , <b>383*</b> , 395*, <b>491*</b> , <b>513*</b> , 596*, 610, 618*, <b>731</b> , 735, 783*, <b>872</b> , 875*, <b>993*</b> , <b>1006**</b> , 1095, <b>1116**</b> , 1127, <b>1258*</b> , <b>1320*</b> , <b>1329*</b> , 1333, 1351, 1376, 1393, <b>1398**</b> , 1424, 1503, 1528                                                                                                                                                                                                                  | 5, <b>39*</b> , 56, 76, 83, 88, 92, <b>156*</b> , <b>260</b> , <b>267**</b> , 282, <b>340**</b> , <b>357*</b> , <b>362**</b> , <b>452**</b> , 519, 540, 585, <b>586*</b> , 602, <b>606*</b> , <b>653*</b> , <b>776*</b> , 783, <b>978*</b> , 1006, 1154*, <b>1186</b> , 1189*, <b>1229*</b> , 1255, <b>1276</b> , <b>1308</b> , 1360*, 1364, 1374, 1413, <b>1429*</b> , <b>1474*</b>                                                                                                                                                                                                         |
| REL <sup>c</sup>     | <b>48</b> , 52, 69, 106, 116, 193, <b>279</b> , 312, <b>331</b> , 372, 376, 397, <b>491</b> , 594, 611, <b>731</b> , 736, 827, <b>872</b> , 956, <b>993</b> , <b>1006</b> , 1017, 1085, 1088, 1092, <b>1116</b> , 1120, 1167, 1177, <b>1258</b> , 1314, <b>1320</b> , 1327, <b>1329</b> , 1348, 1380, <b>1398</b> , 1519, 1576                                                                                                                                                                                                                                                   | <b>39</b> , 126, <b>156</b> , <b>260</b> , <b>267</b> , 279, 325, 328, <b>340</b> , <b>357</b> , <b>362</b> , <b>452</b> , <b>586</b> , 601, 639, <b>653</b> , 721, <b>776</b> , 822, 953, <b>978</b> , 996, 1018, 1078, 1106, 1109, 1183, <b>1229</b> , 1231, <b>1276</b> , 1295, <b>1308</b> , 1316, 1335, 1367, 1380, 1413, <b>1429</b> , 1535                                                                                                                                                                                                                                            |
| MEME <sup>b</sup>    | 21, 38**, 45*, <b>48</b> , 61*, 75*, 77*, 79**, 85**, <b>88*</b> , 96, 109, 121, 143, 145, 170, 173, 176, 187, 191, 193, 201**, 218*, <b>279</b> , <b>331*</b> , <b>352**</b> , 353, 365, 369, <b>383</b> , 387, 395, <b>491*</b> , <b>513*</b> , 596, 610, 618, 623*, 642*, <b>731</b> , 735**, 744, 783, 859, <b>872</b> , 875*, 969**, <b>993*</b> , 1003*, <b>1006**</b> , 1007, 1041, 1063, <b>1116*</b> , 1174*, 1199, 1252, <b>1258*</b> , <b>1320*</b> , <b>1329*</b> , 1341*, 1347*, 1351*, 1376*, 1393, <b>1398**</b> , 1415, 1422, 1444**, 1467*, 1528, 1556**, 1566* | 5, 24*, <b>39*</b> , 76*, 92, 142*, 149*, <b>156*</b> , 170, 181*, 212*, 213*, <b>267**</b> , 282, 299, 318, 323*, <b>340**</b> , 341**, 350, 351, <b>357*</b> , 359, <b>362*</b> , 366, 373*, 377*, 426*, <b>452**</b> , 468*, 509, 519*, 540, 555*, 585, <b>586*</b> , 602, <b>606</b> , 632**, <b>653</b> , 723, 725*, 754, <b>776*</b> , 789*, 791*, 848, 856, 859, 861*, 888**, 889*, 945*, 963, <b>978*</b> , 1004*, 1006*, 1109*, 1150*, 1154, 1170, <b>1186*</b> , 1189, 1287, <b>1308</b> , 1335**, 1339*, 1343, 1346, 1360*, 1374*, 1385, 1390, <b>1429*</b> , <b>1474*</b> , 1535 |
| FUBAR <sup>d</sup>   | <b>1006</b> , <b>1398</b>                                                                                                                                                                                                                                                                                                                                                                                                                                                                                                                                                        | <b>156</b> , <b>267*</b> , <b>340**</b> , <b>357</b> , <b>452</b>                                                                                                                                                                                                                                                                                                                                                                                                                                                                                                                            |

<sup>a</sup>Codons with posterior probabilities >90% in the BEB analyses (\*: P>95%; \*\*: P>99%)

<sup>b</sup>Codons with significance level <0.1 (\*: p<0.05; \*\*: p<0.01)

<sup>c</sup>Codons with Bayes Factor >50

<sup>d</sup>Codons with posterior probabilities >0.90 (\*: P>0.95; \*\*: P>0.99)

Codons identified by three or more than three methods are underlined and in bold.
