# Supplementary material for: Evolution and divergence of the mammalian SAMD9/SAMD9L gene family
Source: PubMed Central journal article supplement (PMC3685527; doi:10.1186/1471-2148-13-121), 2013-06-12
Supplement: 1471-2148-13-121-S11.pdf [file 1471-2148-13-121-S11.pdf]

**Table S4: SAMD9 and SAMD9L amino acid properties under positive selection determined in TreeSAAP**

| <b>Protein</b> | <b>Property</b>                           | <b>Category<sup>a</sup></b> | <b>z-Score<sup>b</sup></b> |
|----------------|-------------------------------------------|-----------------------------|----------------------------|
| <b>SAMD9</b>   | Isoelectric point                         | 8                           | 8.218***                   |
|                | Equilibrium constant (ionization of COOH) | 8                           | 5.001***                   |
|                | Power to be at the C-terminal             | 7                           | 4.032***                   |
|                | Alpha-helical tendencies                  | 6                           | 5.581***                   |
| <b>SAMD9L</b>  | Isoelectric point                         | 8                           | 6.922***                   |
|                | Equilibrium constant (ionization of COOH) | 8                           | 4.797***                   |
|                | Solvent accessible reduction ratio        | 7                           | 4.366***                   |
|                | Power to be at the middle of alpha-helix  | 7                           | 3.554***                   |
|                | Power to be at the C-terminal             | 6                           | 10.442***                  |
|                | Alpha-helical tendencies                  | 6                           | 5.228***                   |
|                | Surrounding hydrophobicity                | 6                           | 3.921***                   |

<sup>a</sup>Between 6 and 8 (the most radical values denoting positive destabilizing selection).

<sup>b</sup>z-Score > 3.09, level of significance p<0.001 (\*\*\*).
